# Supplementary material for: Organocatalytic asymmetric biomimetic transamination of aromatic ketone to optically active amine
Source: Royal Society of Chemistry journal article supplement (doi:10.1039/c2ob26782a), 2012-01-01

# Organocatalytic asymmetric biomimetic transamination of aromatic ketone to optically active amine

Ying Xie,<sup>a</sup> Hongjie Pan,<sup>a</sup> Xiao Xiao,<sup>a</sup> Songlei Li<sup>a</sup> and Yian Shi<sup>\*a,b</sup>

<sup>a</sup> *Beijing National Laboratory for Molecular Sciences, CAS Key Laboratory of Molecular Recognition and Function, Institute of Chemistry, Chinese Academy of Sciences, Beijing 100190, China.*

<sup>b</sup> *Department of Chemistry, Colorado State University, Fort Collins, Colorado 80523, USA*

## Supporting Information

### Table of Contents

|                                                      |      |
|------------------------------------------------------|------|
| General methods                                      | S-2  |
| Experimental procedures and characterization data    | S-2  |
| HPLC data for determination of enantiomeric excesses | S-10 |
| NMR spectra                                          | S-17 |

**General Methods.** All commercially available reagents were used without further purification. Toluene was distilled from sodium-benzophenone. Dichloromethane was distilled from CaH<sub>2</sub>. *N,N*-Dimethylformamide was dried over 4 Å molecular sieves (activated at 180 °C in vacuo over 8 h in vacuum). Column chromatography was performed on silica gel (200-300 mesh). <sup>1</sup>H NMR spectra were recorded on a 400 MHz NMR spectrometer and <sup>13</sup>C NMR spectra were recorded on a 100 MHz NMR spectrometer. IR spectra were recorded on a FT-IR spectrometer. Melting points were uncorrected. *o*-HOPhCH<sub>2</sub>NH<sub>2</sub> was prepared from 2-methoxybenzylamine through demethylation using BBr<sub>3</sub>,<sup>1</sup> and hydroquinine was prepared according to the reported procedure.<sup>2</sup>

(1) A. J. Hallett, G. J. Kwant and J. G. Vries, *Chem.-Eur. J.*, 2009, **15**, 2111.

(2) C. Palacio and S. J. Connon, *Org. Lett.*, 2011, **13**, 1298.

#### Preparation of Catalyst C4

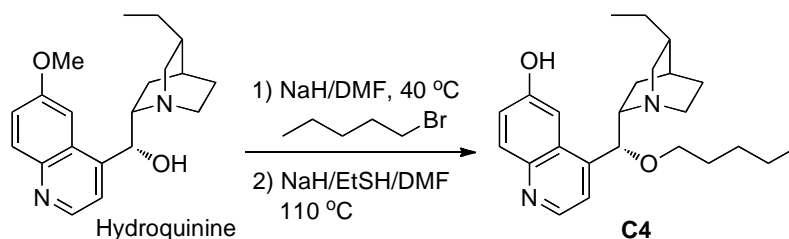

To a solution of hydroquinine (2.0 g, 6.1 mmol) in DMF (20 mL) was added NaH (70% suspension in mineral oil) (0.627 g, 18.3 mmol). After the reaction mixture was stirred at rt for 1 h, 1-bromopentane (1.84 g, 12.2 mmol) was added in one portion. Upon stirring at 40 °C overnight, the reaction mixture was quenched with H<sub>2</sub>O (20 mL), extracted with EtOAc (40 mL x 3), washed with brine (20 mL x 3), dried over MgSO<sub>4</sub>, filtered, and concentrated to give a yellow oil, which was used directly for the next step.

To a suspension of NaH (70% suspension in mineral oil) (2.1 g, 61.3 mmol) (washed with *n*-hexane, dried in vacuo) in DMF (20 mL) was added EtSH (7.58 g, 122.0 mmol) dropwise at 0 °C under N<sub>2</sub> over 10 min. After the reaction mixture was

stirred at rt for 20 min, a solution of the crude product from the previous step in DMF (10 mL) was added in one portion. Upon stirring at 110 °C overnight, the reaction mixture was cooled to rt, acidified with concentrated HCl, washed with *n*-hexane (40 mL x 3), brought to pH = 10 with NH<sub>4</sub>OH, extracted with EtOAc (60 mL x 3), washed with H<sub>2</sub>O and brine, dried over MgSO<sub>4</sub>, filtered, concentrated, and purified by flash column chromatography (silica gel, packed with EtOAc containing 1% Et<sub>3</sub>N) (eluent: EtOAc/MeOH = 40/1 to 10/1) to give compound **C4** as a yellow solid (1.26 g, 54% overall). mp. 82-85 °C;  $[\alpha]_D^{20} = -66.8$  (*c* 0.99, CHCl<sub>3</sub>); IR (film) 3072, 1618, 1464, 1241, 1118 cm<sup>-1</sup>; <sup>1</sup>H NMR (400 MHz, CDCl<sub>3</sub>) δ 11.38 (br s, 1H), 8.67 (d, *J* = 4.4 Hz, 1H), 8.23 (s, 1H), 7.99 (d, *J* = 9.2 Hz, 1H), 7.38 (d, *J* = 4.4 Hz, 1H), 7.30 (dd, *J* = 9.2, 1.6 Hz, 1H), 5.34 (s, 1H), 3.71-3.56 (m, 1H), 3.30-3.16 (m, 3H), 3.05-2.80 (m, 2H), 2.42-2.26 (m, 1H), 2.12-1.98 (m, 1H), 1.98-1.86 (m, 1H), 1.86-1.78 (m, 1H), 1.66-1.48 (m, 4H), 1.45-1.22 (m, 5H), 1.22-1.08 (m, 2H), 0.88 (t, *J* = 7.2 Hz, 3H), 0.75 (t, *J* = 7.6 Hz, 3H); <sup>13</sup>C NMR (100 MHz, CDCl<sub>3</sub>) δ 157.7, 146.4, 144.0, 143.5, 131.4, 128.0, 123.6, 117.8, 106.1, 78.7, 69.4, 59.3, 58.0, 43.5, 37.0, 29.8, 28.5, 27.5, 27.3, 25.4, 22.5, 19.7, 14.1, 11.9; HRMS Calcd for C<sub>24</sub>H<sub>35</sub>N<sub>2</sub>O<sub>2</sub> (M+H): 383.2693; Found: 383.2686.

X. Xiao, Y. Xie, C. Su, M. Liu and Y. Shi, *J. Am. Chem. Soc.*, 2011, **133**, 12914.

### Representative procedure for transamination of ketones (Table 2, entry 1).

To a Schlenk tube was added ketone **14a** (0.120 g, 1.00 mmol), *o*-HOPhCH<sub>2</sub>NH<sub>2</sub> (0.185 g, 1.50 mmol), catalyst **C4** (0.077 g, 0.20 mmol), and toluene (5 mL). After stirring at 110 °C for 72 h, the reaction mixture was concentrated and subjected to flash column chromatography (silica gel, eluent: PE/EtOAc = 30/1) to remove *o*-HOPhCH<sub>2</sub>NH<sub>2</sub>, catalyst, and other byproducts. The resulting aldimine along with small amounts of ketone **14a** was dissolved in THF (1 mL) and 1N HCl (4 mL). Upon stirring at 20 °C for 24 h, the reaction mixture was washed with *n*-hexane (15 mL x 3), brought to pH > 7 with solid K<sub>2</sub>CO<sub>3</sub>, extracted with CH<sub>2</sub>Cl<sub>2</sub> (30 mL x 3),

dried over MgSO<sub>4</sub>, filtered, and concentrated to give amine **15a** as a yellow oil (0.080 g, 66%).

**Preparation of *N*-benzoyl derivative of amine for the determination of the enantiomeric excess.**

To a solution of amine **15a** (0.012 g, 0.10 mmol) in CH<sub>2</sub>Cl<sub>2</sub> (1 mL) were added Et<sub>3</sub>N (0.018 g, 0.18 mmol) and PhCOCl (0.018 g, 0.15 mmol). Upon stirring at rt for 30 min, the reaction mixture was purified by flash column chromatography (silica gel, eluent: PE/EtOAc = 8/1) to give *N*-benzoyl amine **16a** as a white solid (0.019 g, 82%). The sample was subjected to chiral HPLC (Chiralpak AD-H column) to determine the enantiomeric excess.

**Table 2, entry 1**

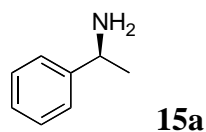

Yellow oil;  $[\alpha]_D^{20} = -26.5$  (*c* 0.33, CHCl<sub>3</sub>) (80% ee); IR (film) 3442, 1629, 1453 cm<sup>-1</sup>; <sup>1</sup>H NMR (400 MHz, CDCl<sub>3</sub>) δ 7.36-7.28 (m, 4H), 7.26-7.19 (m, 1H), 4.10 (q, *J* = 6.8 Hz, 1H), 1.47 (br s, 2H), 1.38 (d, *J* = 6.8 Hz, 3H); <sup>13</sup>C NMR (100 MHz, CDCl<sub>3</sub>) δ 148.0, 128.6, 126.9, 125.8, 51.5, 25.9.

(1) Y. Chu, Z. Shan, D. Liu and N. Sun, *J. Org. Chem.*, 2006, **71**, 3998.

(2) D. Guijarro, Ó. Pablo and M. Yus, *J. Org. Chem.*, 2010, **75**, 5265.

**Table 2, entry 2**

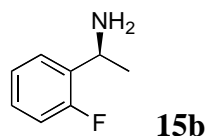

Light yellow oil;  $[\alpha]_D^{20} = -23.1$  (*c* 1.08, CHCl<sub>3</sub>) (84% ee); IR (film) 3360, 1584, 1489 cm<sup>-1</sup>; <sup>1</sup>H NMR (400 MHz, CDCl<sub>3</sub>) δ 7.43-7.38 (m, 1H), 7.23-7.16 (m, 1H),

7.15-7.08 (m, 1H), 7.04-6.97 (m, 1H), 4.38 (q,  $J = 6.4$  Hz, 1H), 1.59 (br s, 2H), 1.42 (d,  $J = 6.4$  Hz, 3H);  $^{13}\text{C}$  NMR (100 MHz,  $\text{CDCl}_3$ )  $\delta$  161.8, 159.3, 134.7, 134.5, 128.3, 128.2, 126.89, 126.85, 124.40, 124.37, 115.7, 115.5, 45.59, 45.56, 24.2; HRMS Calcd for  $\text{C}_8\text{H}_{11}\text{FN}$  (M+H): 140.0870; Found: 140.0868.

L. M. Klingensmith, K. A. Nadeau and G. A. Moniz, *Tetrahedron Lett.*, 2007, **48**, 4589.

**Table 2, entry 3**

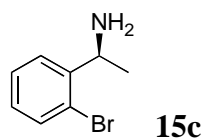

Yellow oil;  $[\alpha]_{\text{D}}^{20} = -21.1$  ( $c$  1.19,  $\text{CHCl}_3$ ) (71% ee); IR (film) 3441, 1631, 1468  $\text{cm}^{-1}$ ;  $^1\text{H}$  NMR (400 MHz,  $\text{CDCl}_3$ )  $\delta$  7.54-7.47 (m, 2H), 7.35-7.27 (m, 1H), 7.12-7.04 (m, 1H), 4.49 (q,  $J = 6.4$  Hz, 1H), 1.76 (br s, 2H), 1.38 (d,  $J = 6.8$  Hz, 3H);  $^{13}\text{C}$  NMR (100 MHz,  $\text{CDCl}_3$ )  $\delta$  146.3, 133.1, 128.4, 128.0, 126.7, 123.3, 50.2, 23.9; HRMS Calcd for  $\text{C}_8\text{H}_{11}\text{BrN}$  (M+H): 200.0069; Found: 200.0069.

L. M. Klingensmith, K. A. Nadeau and G. A. Moniz, *Tetrahedron Lett.*, 2007, **48**, 4589.

**Table 2, entry 4**

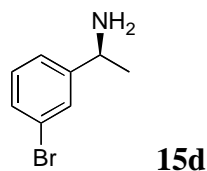

Yellow oil;  $[\alpha]_{\text{D}}^{20} = -19.7$  ( $c$  0.95,  $\text{CHCl}_3$ ) (78% ee); IR (film) 3374, 1594, 1567, 1474  $\text{cm}^{-1}$ ;  $^1\text{H}$  NMR (400 MHz,  $\text{CDCl}_3$ )  $\delta$  7.50 (s, 1H), 7.35 (d,  $J = 7.6$  Hz, 1H), 7.26 (d,  $J = 8.0$  Hz, 1H), 7.21-7.14 (m, 1H), 4.12-4.03 (m, 1H), 1.66 (br s, 2H), 1.36 (d,  $J = 6.0$  Hz, 3H);  $^{13}\text{C}$  NMR (100 MHz,  $\text{CDCl}_3$ )  $\delta$  150.2, 130.2, 130.0, 129.1, 124.6, 122.7, 51.1, 25.8; HRMS Calcd for  $\text{C}_8\text{H}_{11}\text{BrN}$  (M+H): 200.0069; Found:

200.0065.

**Table 2, entry 5**

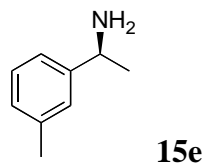

Yellow oil;  $[\alpha]_D^{20} = -29.2$  (*c* 1.15,  $\text{CHCl}_3$ ) (82% ee); IR (film) 3441, 1608, 1450  $\text{cm}^{-1}$ ;  $^1\text{H}$  NMR (400 MHz,  $\text{CDCl}_3$ )  $\delta$  7.26-7.17 (m, 1H), 7.17-7.09 (m, 2H), 7.07-7.01 (m, 1H), 4.06 (q,  $J = 6.8$  Hz, 1H), 2.34 (s, 3H), 1.75 (br s, 2H), 1.37 (d,  $J = 6.4$  Hz, 3H);  $^{13}\text{C}$  NMR (100 MHz,  $\text{CDCl}_3$ )  $\delta$  147.8, 138.2, 128.5, 127.7, 126.6, 122.9, 51.4, 25.7, 21.6; HRMS Calcd for  $\text{C}_9\text{H}_{13}\text{NNa}$  ( $\text{M}+\text{Na}$ ): 158.0940; Found: 158.0937.

M. Pallavicini, E. Valoti, L. Villa and O. Piccolo, *Tetrahedron: Asymmetry*, 2001, **12**, 1071.

**Table 2, entry 6**

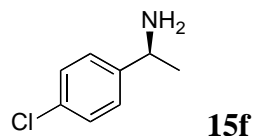

Yellow oil;  $[\alpha]_D^{20} = -26.2$  (*c* 0.99,  $\text{CHCl}_3$ ) (79% ee); IR (film) 3361, 1592, 1492  $\text{cm}^{-1}$ ;  $^1\text{H}$  NMR (400 MHz,  $\text{CDCl}_3$ )  $\delta$  7.30-7.26 (m, 4H), 4.10 (q,  $J = 6.4$  Hz, 1H), 1.88 (br s, 2H), 1.36 (d,  $J = 6.8$  Hz, 3H);  $^{13}\text{C}$  NMR (100 MHz,  $\text{CDCl}_3$ )  $\delta$  146.0, 132.6, 128.8, 127.4, 50.9, 25.7; HRMS Calcd for  $\text{C}_8\text{H}_{11}\text{ClN}$  ( $\text{M}+\text{H}$ ): 156.0575; Found: 156.0571.

D. Guijarro, Ó. Pablo and M. Yus, *J. Org. Chem.*, 2010, **75**, 5265.

**Table 2, entry 7**

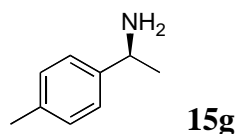

Yellow oil;  $[\alpha]_D^{20} = -36.3$  (*c* 1.02,  $\text{CHCl}_3$ ) (83% ee); IR (film) 3286, 1514, 1455  $\text{cm}^{-1}$ ;  $^1\text{H}$  NMR (400 MHz,  $\text{CDCl}_3$ )  $\delta$  7.27-7.20 (m, 2H), 7.17-7.11 (m, 2H), 4.13-4.03 (m, 1H), 2.33 (s, 3H), 1.78 (br s, 2H), 1.37 (d,  $J = 6.4$  Hz, 3H);  $^{13}\text{C}$  NMR (100 MHz,  $\text{CDCl}_3$ )  $\delta$  145.0, 136.5, 129.3, 125.8, 51.2, 25.8, 21.2; HRMS Calcd for  $\text{C}_9\text{H}_{13}\text{NNa}$  ( $\text{M}+\text{Na}$ ): 158.0940; Found: 158.0936.

D. R. J. Hose, M. F. Mahon, K. C. Molloy, T. Raynham and M. Wills, *J. Chem. Soc., Perkin Trans. 1*, 1996, 691.

**Table 2, entry 8**

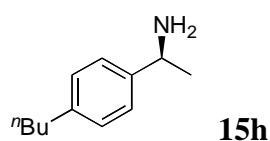

Yellow oil;  $[\alpha]_D^{20} = -23.2$  (*c* 1.12,  $\text{CHCl}_3$ ) (78% ee); IR (film) 3290, 1512, 1456  $\text{cm}^{-1}$ ;  $^1\text{H}$  NMR (400 MHz,  $\text{CDCl}_3$ )  $\delta$  7.24 (d,  $J = 8.0$  Hz, 2H), 7.13 (d,  $J = 8.0$  Hz, 2H), 4.07 (q,  $J = 6.4$  Hz, 1H), 2.59 (t,  $J = 7.6$  Hz, 2H), 1.72 (br s, 2H), 1.64-1.53 (m, 2H), 1.41-1.29 (m, 5H), 0.92 (t,  $J = 7.6$  Hz, 3H);  $^{13}\text{C}$  NMR (100 MHz,  $\text{CDCl}_3$ )  $\delta$  145.1, 141.6, 128.6, 125.7, 51.2, 35.4, 33.8, 25.7, 22.5, 14.1; HRMS Calcd for  $\text{C}_{12}\text{H}_{20}\text{N}$  ( $\text{M}+\text{H}$ ): 178.1590; Found: 178.1590.

**Table 2, entry 9**

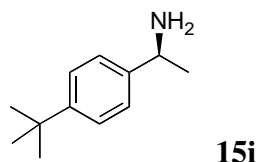

Yellow oil;  $[\alpha]_D^{20} = -20.0$  (*c* 1.28,  $\text{CHCl}_3$ ) (76% ee); IR (film) 3291, 1509, 1461  $\text{cm}^{-1}$ ;  $^1\text{H}$  NMR (400 MHz,  $\text{CDCl}_3$ )  $\delta$  7.37-7.33 (m, 2H), 7.29-7.23 (m, 2H), 4.08 (q,  $J = 6.4$  Hz, 1H), 1.73 (br s, 2H), 1.38 (d,  $J = 6.4$  Hz, 3H), 1.31 (s, 9H);  $^{13}\text{C}$  NMR (100 MHz,  $\text{CDCl}_3$ )  $\delta$  149.8, 144.9, 125.50, 125.49, 51.1, 34.6, 31.5, 25.7; HRMS

Calcd for C<sub>12</sub>H<sub>20</sub>N (M+H): 178.1590; Found: 178.1586.

**Table 2, entry 10**

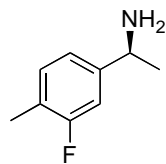

**15j**

Yellow oil;  $[\alpha]_D^{20} = -25.5$  (*c* 1.17, CHCl<sub>3</sub>) (85% ee); IR (film) 3291, 1580, 1505 cm<sup>-1</sup>; <sup>1</sup>H NMR (400 MHz, CDCl<sub>3</sub>) δ 7.15-7.08 (m, 1H), 7.04-6.97 (m, 2H), 4.08 (q, *J* = 6.4 Hz, 1H), 2.24 (d, *J* = 1.2 Hz, 3H), 1.83 (br s, 2H), 1.36 (d, *J* = 6.8 Hz, 3H); <sup>13</sup>C NMR (100 MHz, CDCl<sub>3</sub>) δ 162.8, 160.4, 147.9, 131.6, 131.5, 123.3, 123.1, 121.20, 121.17, 112.5, 112.3, 50.9, 25.8, 14.39, 14.35; HRMS Calcd for C<sub>9</sub>H<sub>13</sub>FN (M+H): 154.1027; Found: 154.1023.

**Table 2, entry 11**

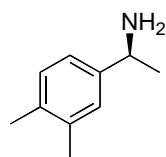

**15k**

Yellow oil;  $[\alpha]_D^{20} = -27.0$  (*c* 1.21, CHCl<sub>3</sub>) (83% ee); IR (film) 3291, 1504, 1451 cm<sup>-1</sup>; <sup>1</sup>H NMR (400 MHz, CDCl<sub>3</sub>) δ 7.15-7.04 (m, 3H), 4.12-4.00 (m, 1H), 2.27 (s, 3H), 2.25 (s, 3H), 1.67 (br s, 2H), 1.38 (d, *J* = 6.0 Hz, 3H); <sup>13</sup>C NMR (100 MHz, CDCl<sub>3</sub>) δ 145.4, 136.8, 135.2, 129.9, 127.2, 123.2, 51.2, 25.8, 20.0, 19.5; HRMS Calcd for C<sub>10</sub>H<sub>15</sub>NNa (M+Na): 172.1097; Found: 172.1093.

**Table 2, entry 12**

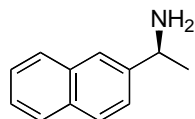

**15l**

Light red oil;  $[\alpha]_D^{20} = -21.0$  (*c* 0.98, CHCl<sub>3</sub>) (81% ee); IR (film) 3364, 3287, 1601, 1507, 1451 cm<sup>-1</sup>; <sup>1</sup>H NMR (400 MHz, CDCl<sub>3</sub>) δ 7.86-7.76 (m, 4H), 7.52-7.41 (m, 3H), 4.29 (q, *J* = 6.4 Hz, 1H), 1.74 (br s, 2H), 1.48 (d, *J* = 6.4 Hz, 3H); <sup>13</sup>C NMR



(100 MHz, CDCl<sub>3</sub>) δ 145.2, 133.7, 132.8, 128.4, 127.9, 127.8, 126.2, 125.7, 124.7, 123.9, 51.6, 25.7; HRMS Calcd for C<sub>12</sub>H<sub>13</sub>NNa (M+Na): 194.0940; Found: 194.0938.

D. Guijarro, Ó. Pablo and M. Yus, *J. Org. Chem.*, 2010, **75**, 5265.

**Table 2, entry 13**

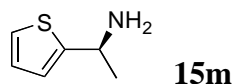

Yellow oil;  $[\alpha]_D^{20} = -8.6$  (*c* 0.79, CHCl<sub>3</sub>) (70% ee); IR (film) 3441, 1630, 1450, 1372, 1309 cm<sup>-1</sup>; <sup>1</sup>H NMR (400 MHz, CDCl<sub>3</sub>) δ 7.18-7.14 (m, 1H), 6.95-6.88 (m, 2H), 4.36 (q, *J* = 6.8 Hz, 1H), 1.73 (br s, 2H), 1.48 (d, *J* = 6.4 Hz, 3H); <sup>13</sup>C NMR (100 MHz, CDCl<sub>3</sub>) δ 153.0, 126.7, 123.5, 122.2, 47.5, 26.5.

D. Guijarro, Ó. Pablo and M. Yus, *J. Org. Chem.*, 2010, **75**, 5265.

**Table 2, entry 14**

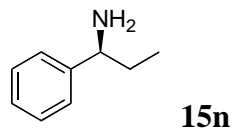

Yellow oil;  $[\alpha]_D^{20} = -14.5$  (*c* 0.60, CHCl<sub>3</sub>) (77% ee); IR (film) 3418, 1628, 1454 cm<sup>-1</sup>; <sup>1</sup>H NMR (400 MHz, CDCl<sub>3</sub>) δ 7.36-7.28 (m, 4H), 7.26-7.20 (m, 1H), 3.80 (t, *J* = 6.4 Hz, 1H), 1.80-1.60 (m, 4H), 0.87 (t, *J* = 7.2 Hz, 3H); <sup>13</sup>C NMR (100 MHz, CDCl<sub>3</sub>) δ 146.6, 128.6, 127.1, 126.6, 58.0, 32.6, 11.1; HRMS Calcd for C<sub>9</sub>H<sub>13</sub>NNa (M+Na): 158.0940; Found: 158.0937.

(1) Y. Chu, Z. Shan, D. Liu and N. Sun, *J. Org. Chem.*, 2006, **71**, 3998.

(2) D. Guijarro, Ó. Pablo and M. Yus, *J. Org. Chem.*, 2010, **75**, 5265.

## The chromatograms for determination of enantioselectivity

Table 2, entry 1

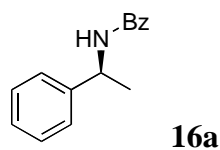

**HPLC Condition:** Column: Chiralpak AD-H, Daicel Chemical Industries, Ltd.;  
**Eluent:** Hexanes/IPA (85/15); **Flow rate:** 0.5 mL/min; **Detection:** UV230 nm.

Racemic standard

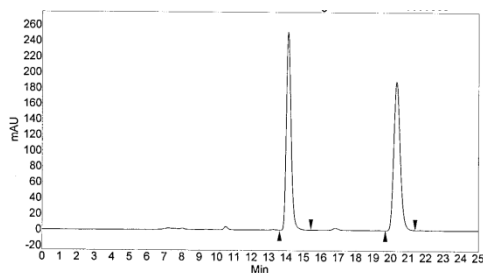

| Index | Time [Min] | Area % [%] | Start [Min] | End [Min] |
|-------|------------|------------|-------------|-----------|
| 1     | 14.12      | 49.875     | 13.62       | 15.43     |
| 2     | 20.32      | 50.125     | 19.69       | 21.39     |
| Total |            | 100.000    |             |           |

Enantio-enriched product

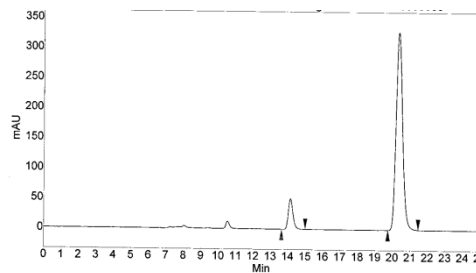

| Index | Time [Min] | Area % [%] | Start [Min] | End [Min] |
|-------|------------|------------|-------------|-----------|
| 1     | 14.16      | 10.049     | 13.65       | 15.02     |
| 2     | 20.35      | 89.951     | 19.74       | 21.47     |
| Total |            | 100.000    |             |           |

Table 2, entry 2

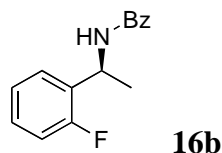

**HPLC Condition:** Column: Chiralpak AD-H, Daicel Chemical Industries, Ltd.;  
**Eluent:** Hexanes/IPA (85/15); **Flow rate:** 0.5 mL/min; **Detection:** UV230 nm.

Racemic standard

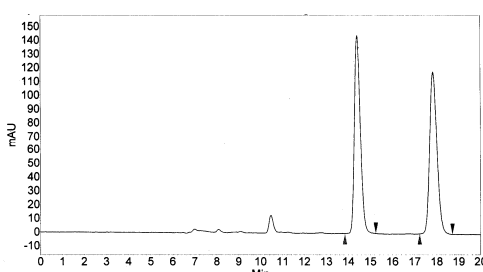

| Index | Time [Min] | Area % [%] | Start [Min] | End [Min] |
|-------|------------|------------|-------------|-----------|
| 1     | 14.43      | 49.961     | 13.85       | 15.25     |
| 2     | 17.85      | 50.039     | 17.23       | 18.72     |
| Total |            | 100.000    |             |           |

Enantio-enriched product

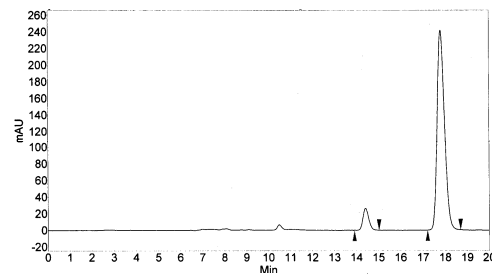

| Index | Time [Min] | Area % [%] | Start [Min] | End [Min] |
|-------|------------|------------|-------------|-----------|
| 1     | 14.41      | 7.927      | 13.91       | 15.03     |
| 2     | 17.81      | 92.073     | 17.21       | 18.70     |
| Total |            | 100.000    |             |           |

Table 2, entry 3

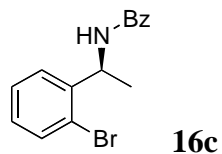

**HPLC Condition:** **Column:** Chiralpak AD-H, Daicel Chemical Industries, Ltd.;  
**Eluent:** Hexanes/IPA (85/15); **Flow rate:** 0.5 mL/min; **Detection:** UV230 nm.

**Racemic standard**

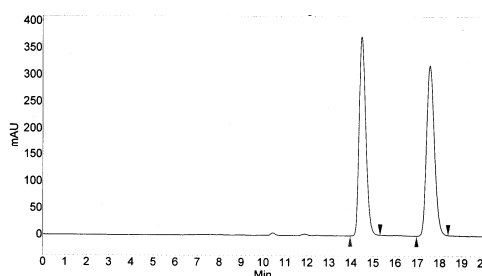

| Index | Time [Min] | Area [%] | Start [Min] | End [Min] |
|-------|------------|----------|-------------|-----------|
| 1     | 14.49      | 49.729   | 13.97       | 15.32     |
| 2     | 17.57      | 50.271   | 16.96       | 18.38     |
| Total |            | 100.000  |             |           |

**Enantio-enriched product**

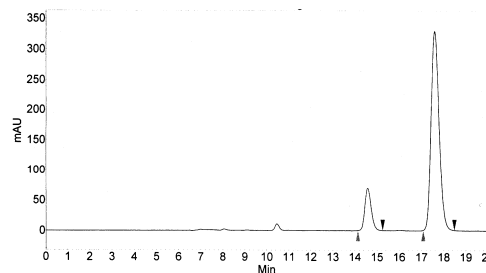

| Index | Time [Min] | Area [%] | Start [Min] | End [Min] |
|-------|------------|----------|-------------|-----------|
| 1     | 14.57      | 14.435   | 14.13       | 15.25     |
| 2     | 17.60      | 85.565   | 17.08       | 18.48     |
| Total |            | 100.000  |             |           |

Table 2, entry 4

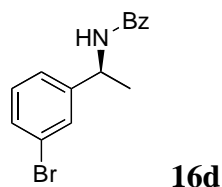

**HPLC Condition:** **Column:** Chiralpak AD-H, Daicel Chemical Industries, Ltd.;  
**Eluent:** Hexanes/IPA (85/15); **Flow rate:** 0.5 mL/min; **Detection:** UV230 nm.

**Racemic standard**

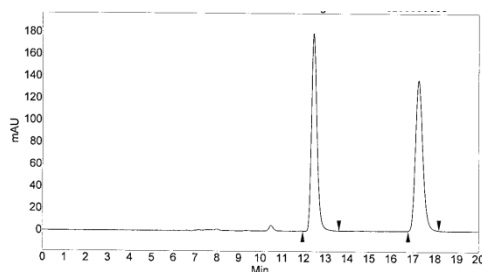

| Index | Time [Min] | Area [%] | Start [Min] | End [Min] |
|-------|------------|----------|-------------|-----------|
| 1     | 12.45      | 49.950   | 11.95       | 13.62     |
| 2     | 17.25      | 50.050   | 16.78       | 18.18     |
| Total |            | 100.000  |             |           |

**Enantio-enriched product**

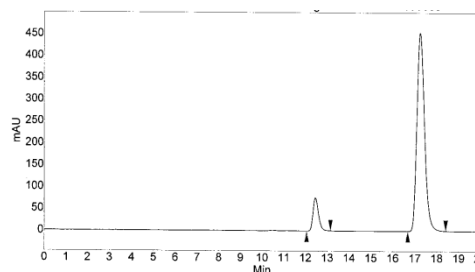

| Index | Time [Min] | Area [%] | Start [Min] | End [Min] |
|-------|------------|----------|-------------|-----------|
| 1     | 12.45      | 10.760   | 12.05       | 13.15     |
| 2     | 17.24      | 89.240   | 16.68       | 18.41     |
| Total |            | 100.000  |             |           |

Table 2, entry 5

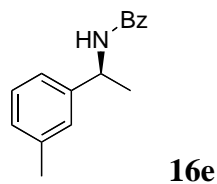

**HPLC Condition:** **Column:** Chiralpak AD-H, Daicel Chemical Industries, Ltd.;  
**Eluent:** Hexanes/IPA (90/10); **Flow rate:** 0.5 mL/min; **Detection:** UV230 nm.

**Racemic standard**

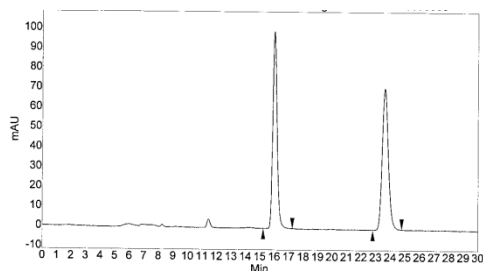

| Index | Time [Min] | Area [%] | Start [Min] | End [Min] |
|-------|------------|----------|-------------|-----------|
| 1     | 16.00      | 49.868   | 15.23       | 17.24     |
| 2     | 23.61      | 50.132   | 22.79       | 24.77     |
| Total |            | 100.000  |             |           |

**Enantio-enriched product**

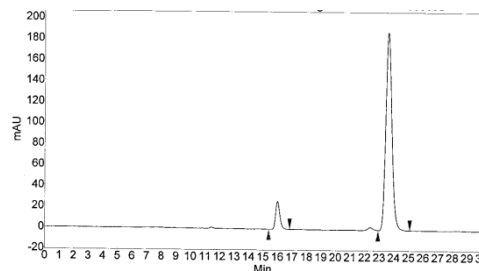

| Index | Time [Min] | Area [%] | Start [Min] | End [Min] |
|-------|------------|----------|-------------|-----------|
| 1     | 16.00      | 8.949    | 15.39       | 16.84     |
| 2     | 23.60      | 91.051   | 22.91       | 25.08     |
| Total |            | 100.000  |             |           |

Table 2, entry 6

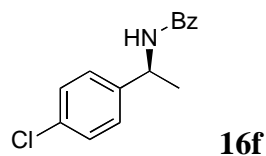

**HPLC Condition:** **Column:** Chiralpak AD-H, Daicel Chemical Industries, Ltd.;  
**Eluent:** Hexanes/IPA (85/15); **Flow rate:** 0.5 mL/min; **Detection:** UV230 nm.

**Racemic standard**

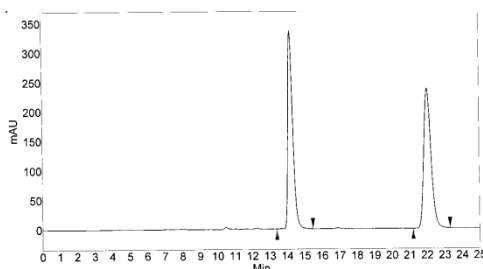

| Index | Time [Min] | Area [%] | Start [Min] | End [Min] |
|-------|------------|----------|-------------|-----------|
| 1     | 14.21      | 49.607   | 13.42       | 15.48     |
| 2     | 22.03      | 50.393   | 21.21       | 23.30     |
| Total |            | 100.000  |             |           |

**Enantio-enriched product**

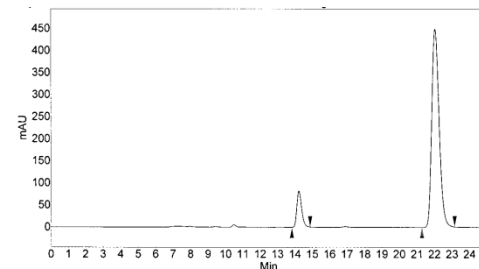

| Index | Time [Min] | Area [%] | Start [Min] | End [Min] |
|-------|------------|----------|-------------|-----------|
| 1     | 14.24      | 10.646   | 13.83       | 14.89     |
| 2     | 22.04      | 89.354   | 21.29       | 23.14     |
| Total |            | 100.000  |             |           |

Table 2, entry 7

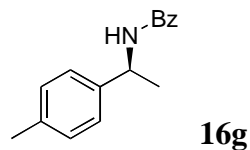

**HPLC Condition:** **Column:** Chiralpak AD-H, Daicel Chemical Industries, Ltd.;  
**Eluent:** Hexanes/IPA (85/15); **Flow rate:** 0.5 mL/min; **Detection:** UV230 nm.

**Racemic standard**

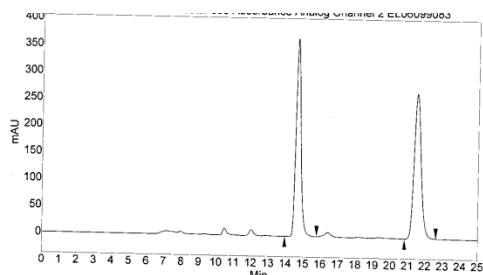

| Index | Time [Min] | Area % [%] | Start [Min] | End [Min] |
|-------|------------|------------|-------------|-----------|
| 1     | 14.67      | 49.738     | 13.96       | 15.79     |
| 2     | 21.51      | 50.262     | 20.82       | 22.60     |
| Total |            | 100.000    |             |           |

**Enantio-enriched product**

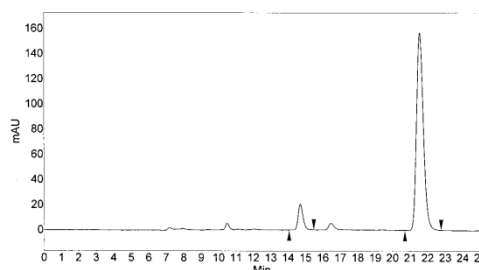

| Index | Time [Min] | Area % [%] | Start [Min] | End [Min] |
|-------|------------|------------|-------------|-----------|
| 1     | 14.71      | 8.490      | 14.06       | 15.48     |
| 2     | 21.55      | 91.510     | 20.69       | 22.76     |
| Total |            | 100.000    |             |           |

Table 2, entry 8

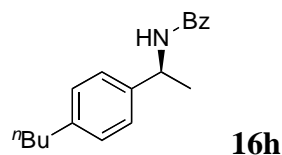

**HPLC Condition:** **Column:** Chiralpak AD-H, Daicel Chemical Industries, Ltd.;  
**Eluent:** Hexanes/IPA (90/10); **Flow rate:** 0.5 mL/min; **Detection:** UV230 nm.

**Racemic standard**

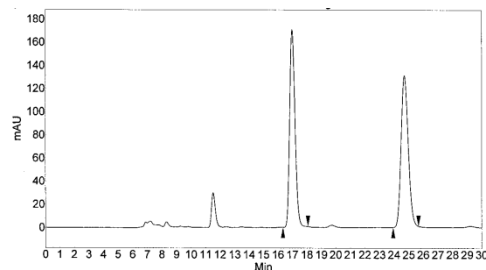

| Index | Time [Min] | Area % [%] | Start [Min] | End [Min] |
|-------|------------|------------|-------------|-----------|
| 1     | 16.99      | 49.676     | 16.35       | 18.08     |
| 2     | 24.71      | 50.324     | 23.93       | 25.67     |
| Total |            | 100.000    |             |           |

**Enantio-enriched product**

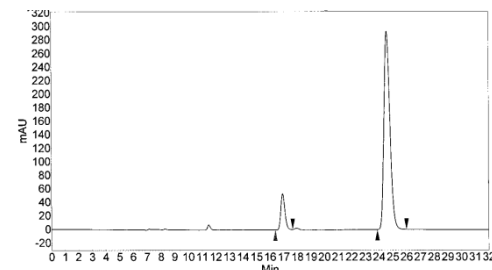

| Index | Time [Min] | Area % [%] | Start [Min] | End [Min] |
|-------|------------|------------|-------------|-----------|
| 1     | 16.93      | 11.024     | 16.38       | 17.67     |
| 2     | 24.59      | 88.976     | 23.88       | 25.99     |
| Total |            | 100.000    |             |           |

Table 2, entry 9

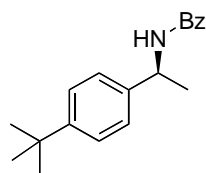

16i

**HPLC Condition:** Column: Chiralpak AD-H, Daicel Chemical Industries, Ltd.;  
**Eluent:** Hexanes/IPA (90/10); **Flow rate:** 0.5 mL/min; **Detection:** UV230 nm.

Racemic standard

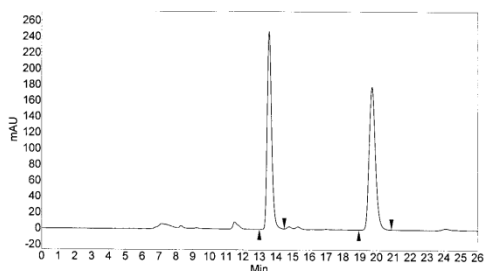

| Index | Time [Min] | Area [%] | Start [Min] | End [Min] |
|-------|------------|----------|-------------|-----------|
| 1     | 13.57      | 49.689   | 12.99       | 14.49     |
| 2     | 19.72      | 50.311   | 18.94       | 20.88     |
| Total |            | 100.000  |             |           |

Enantio-enriched product

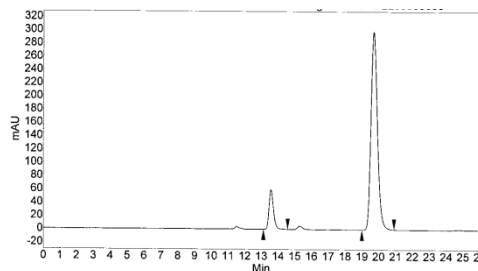

| Index | Time [Min] | Area [%] | Start [Min] | End [Min] |
|-------|------------|----------|-------------|-----------|
| 1     | 13.57      | 12.177   | 13.12       | 14.57     |
| 2     | 19.69      | 87.823   | 19.00       | 20.90     |
| Total |            | 100.000  |             |           |

Table 2, entry 10

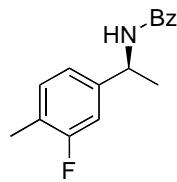

16j

**HPLC Condition:** Column: Chiralpak AD-H, Daicel Chemical Industries, Ltd.;  
**Eluent:** Hexanes/IPA (85/15); **Flow rate:** 0.5 mL/min; **Detection:** UV230 nm.

Racemic standard

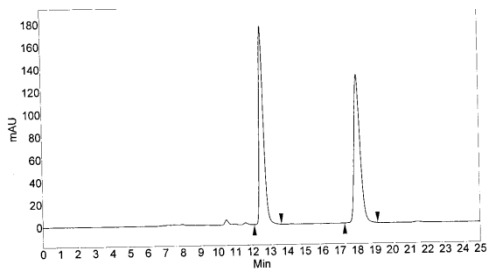

| Index | Time [Min] | Area [%] | Start [Min] | End [Min] |
|-------|------------|----------|-------------|-----------|
| 1     | 12.57      | 49.648   | 12.10       | 13.65     |
| 2     | 18.05      | 50.352   | 17.29       | 19.17     |
| Total |            | 100.000  |             |           |

Enantio-enriched product

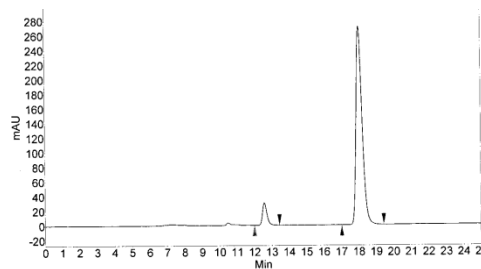

| Index | Time [Min] | Area [%] | Start [Min] | End [Min] |
|-------|------------|----------|-------------|-----------|
| 1     | 12.57      | 7.565    | 12.00       | 13.44     |
| 2     | 18.05      | 92.435   | 17.03       | 19.43     |
| Total |            | 100.000  |             |           |

Table 2, entry 11

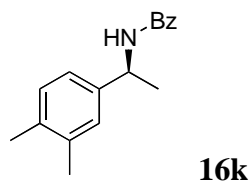

**HPLC Condition:** **Column:** Chiralpak AD-H, Daicel Chemical Industries, Ltd.;  
**Eluent:** Hexanes/IPA (85/15); **Flow rate:** 0.5 mL/min; **Detection:** UV230 nm.

**Racemic standard**

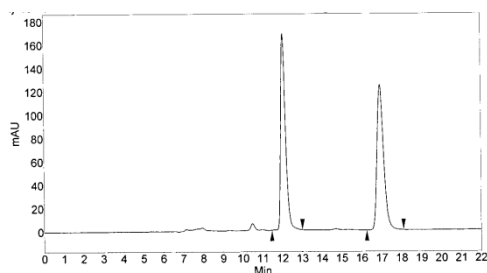

| Index | Time [Min] | Area %  | Start [Min] | End [Min] |
|-------|------------|---------|-------------|-----------|
| 1     | 12.05      | 49.980  | 11.47       | 13.01     |
| 2     | 16.95      | 50.020  | 16.26       | 18.10     |
| Total |            | 100.000 |             |           |

**Enantio-enriched product**

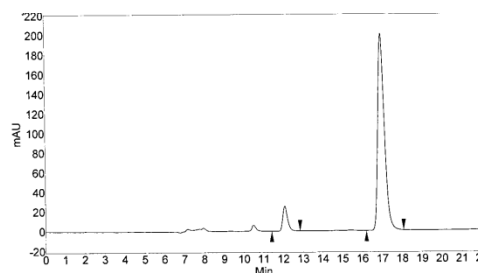

| Index | Time [Min] | Area %  | Start [Min] | End [Min] |
|-------|------------|---------|-------------|-----------|
| 1     | 12.08      | 8.323   | 11.42       | 12.85     |
| 2     | 16.97      | 91.677  | 16.21       | 18.07     |
| Total |            | 100.000 |             |           |

Table 2, entry 12

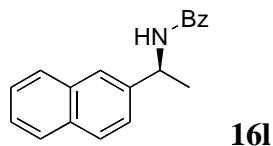

**HPLC Condition:** **Column:** Chiralpak AD-H, Daicel Chemical Industries, Ltd.;  
**Eluent:** Hexanes/IPA (85/15); **Flow rate:** 0.5 mL/min; **Detection:** UV230 nm.

**Racemic standard**

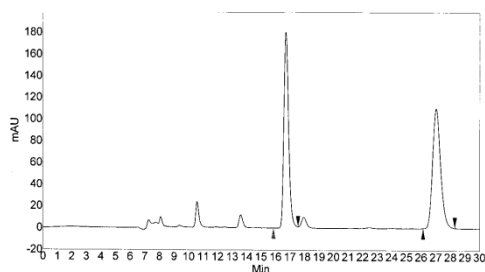

| Index | Time [Min] | Area %  | Start [Min] | End [Min] |
|-------|------------|---------|-------------|-----------|
| 1     | 16.71      | 49.641  | 15.85       | 17.55     |
| 2     | 27.01      | 50.359  | 26.13       | 28.30     |
| Total |            | 100.000 |             |           |

**Enantio-enriched product**

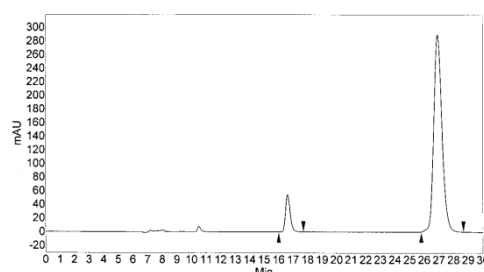

| Index | Time [Min] | Area %  | Start [Min] | End [Min] |
|-------|------------|---------|-------------|-----------|
| 1     | 16.63      | 9.666   | 16.01       | 17.71     |
| 2     | 26.91      | 90.334  | 25.79       | 28.67     |
| Total |            | 100.000 |             |           |

Table 2, entry 13

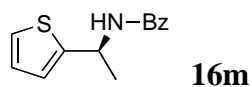

**HPLC Condition:** **Column:** Chiralpak AD-H, Daicel Chemical Industries, Ltd.;  
**Eluent:** Hexanes/IPA (85/15); **Flow rate:** 0.5 mL/min; **Detection:** UV230 nm.

**Racemic standard**

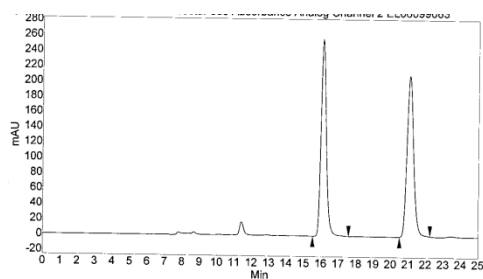

| Index | Time [Min] | Area [%] | Start [Min] | End [Min] |
|-------|------------|----------|-------------|-----------|
| 1     | 16.11      | 49.662   | 15.53       | 17.60     |
| 2     | 21.07      | 50.338   | 20.51       | 22.24     |
| Total |            | 100.000  |             |           |

**Enantio-enriched product**

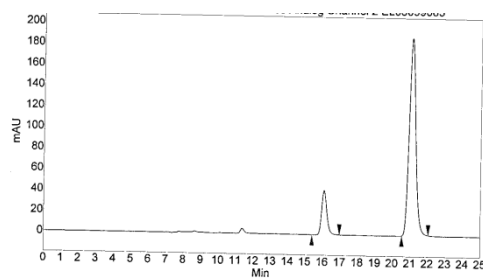

| Index | Time [Min] | Area [%] | Start [Min] | End [Min] |
|-------|------------|----------|-------------|-----------|
| 1     | 16.09      | 15.188   | 15.40       | 16.98     |
| 2     | 21.07      | 84.814   | 20.54       | 22.03     |
| Total |            | 100.000  |             |           |

Table 2, entry 14

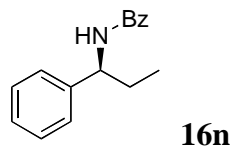

**HPLC Condition:** **Column:** Chiralpak AD-H, Daicel Chemical Industries, Ltd.;  
**Eluent:** Hexanes/IPA (85/15); **Flow rate:** 0.5 mL/min; **Detection:** UV230 nm.

**Racemic standard**

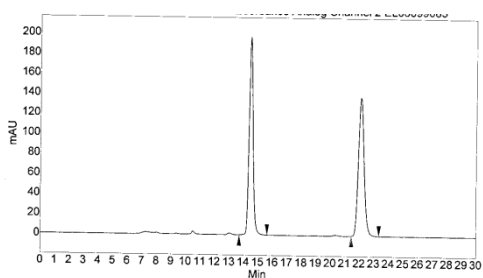

| Index | Time [Min] | Area [%] | Start [Min] | End [Min] |
|-------|------------|----------|-------------|-----------|
| 1     | 14.47      | 49.954   | 13.72       | 15.63     |
| 2     | 22.08      | 50.046   | 21.46       | 23.34     |
| Total |            | 100.000  |             |           |

**Enantio-enriched product**

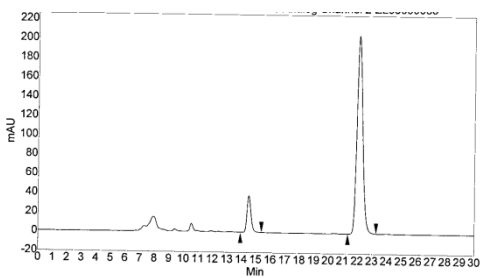

| Index | Time [Min] | Area [%] | Start [Min] | End [Min] |
|-------|------------|----------|-------------|-----------|
| 1     | 14.51      | 11.348   | 13.93       | 15.39     |
| 2     | 22.09      | 88.652   | 21.33       | 23.28     |
| Total |            | 100.000  |             |           |



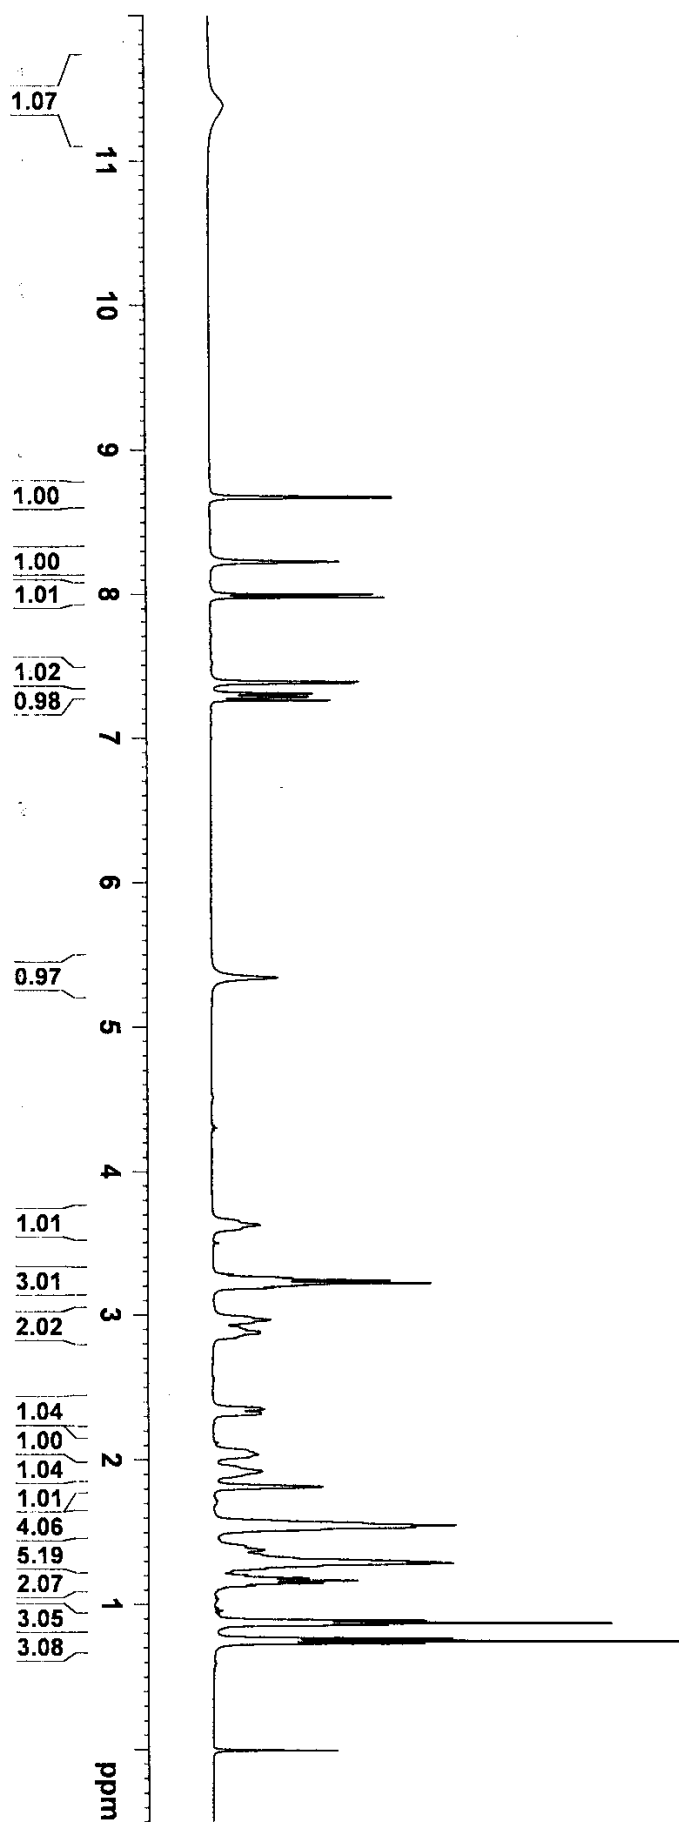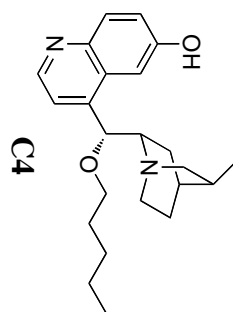

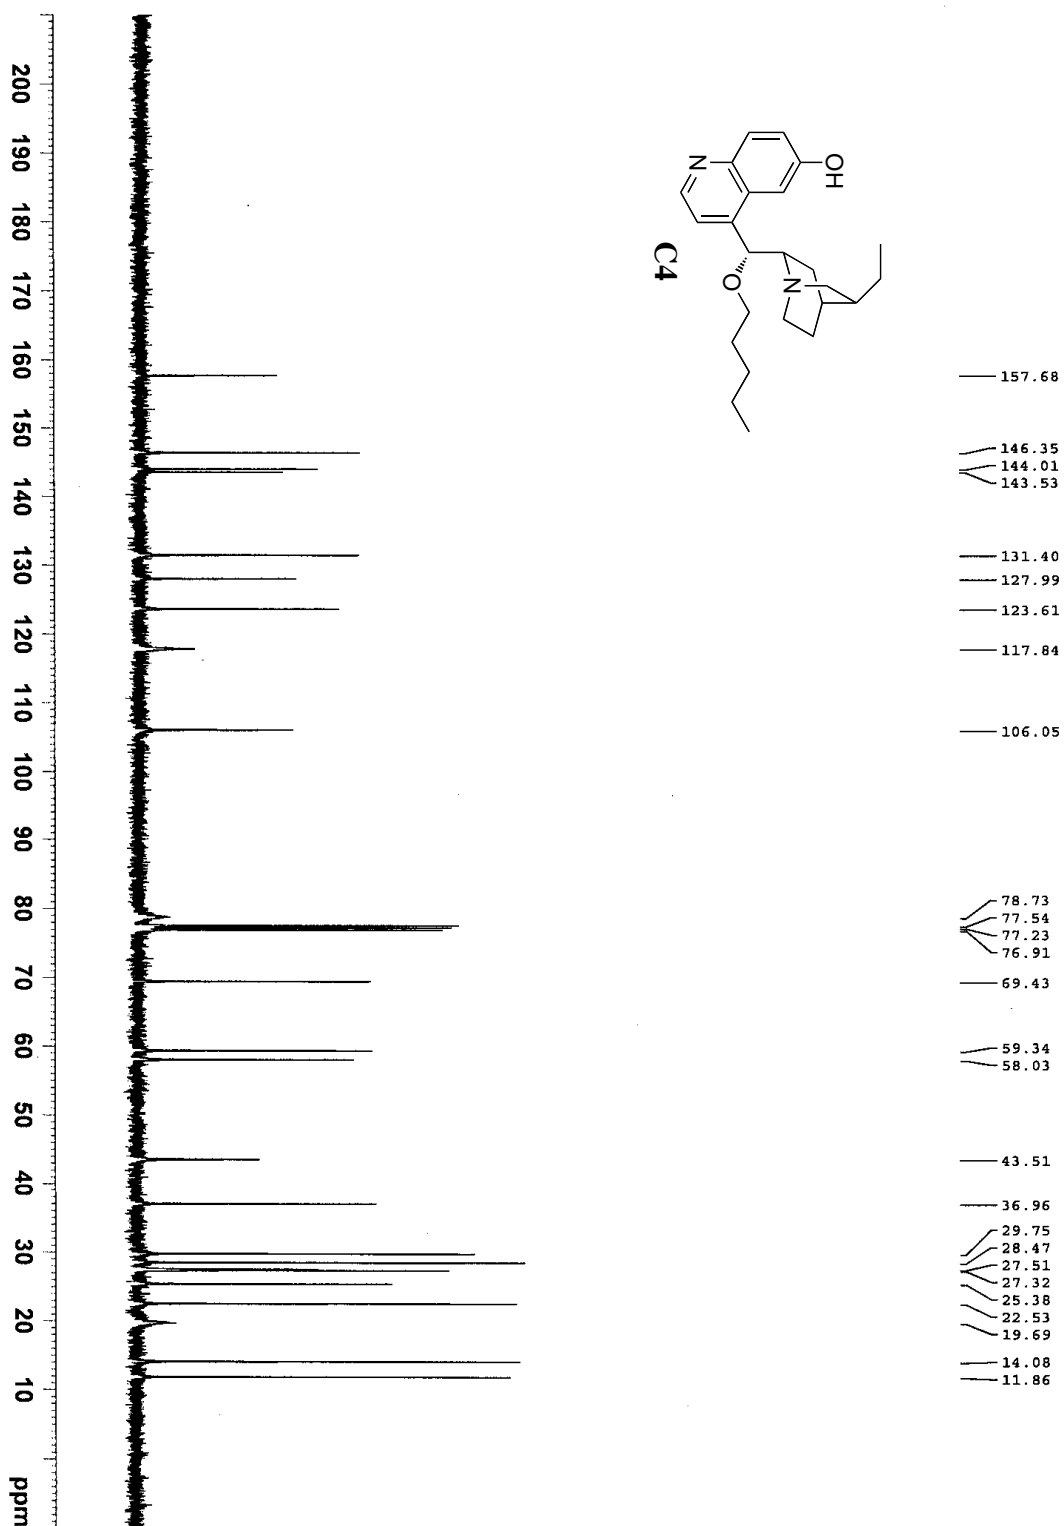

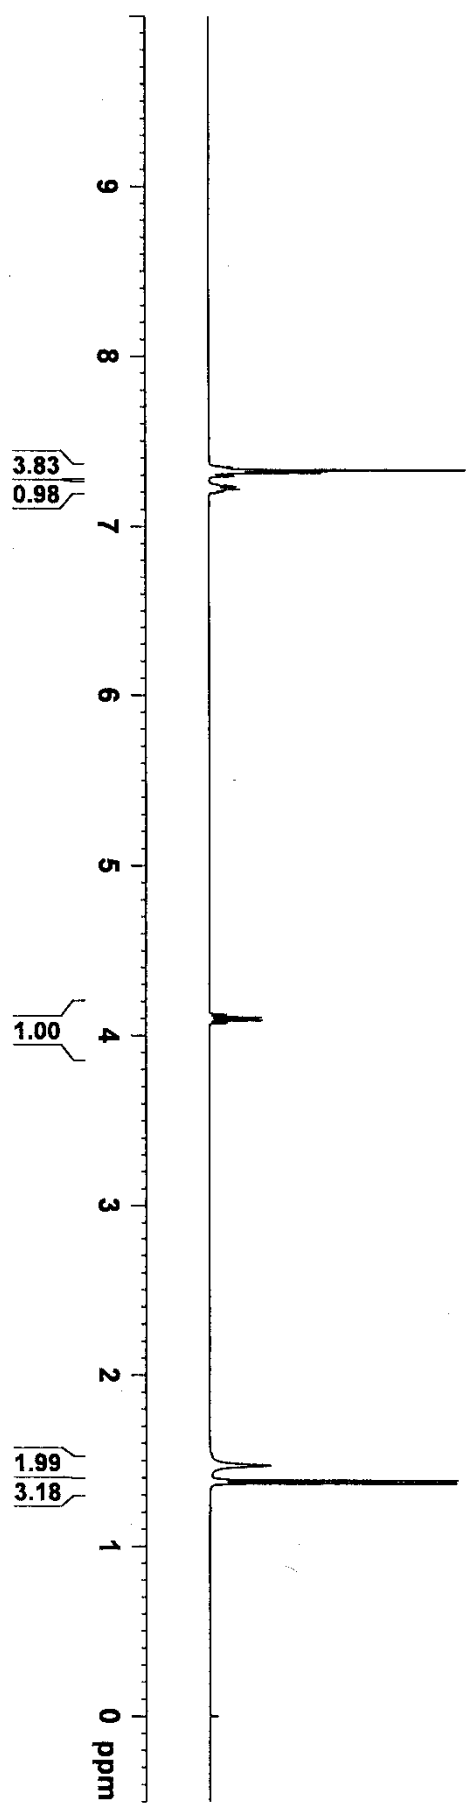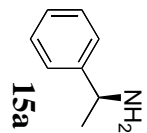

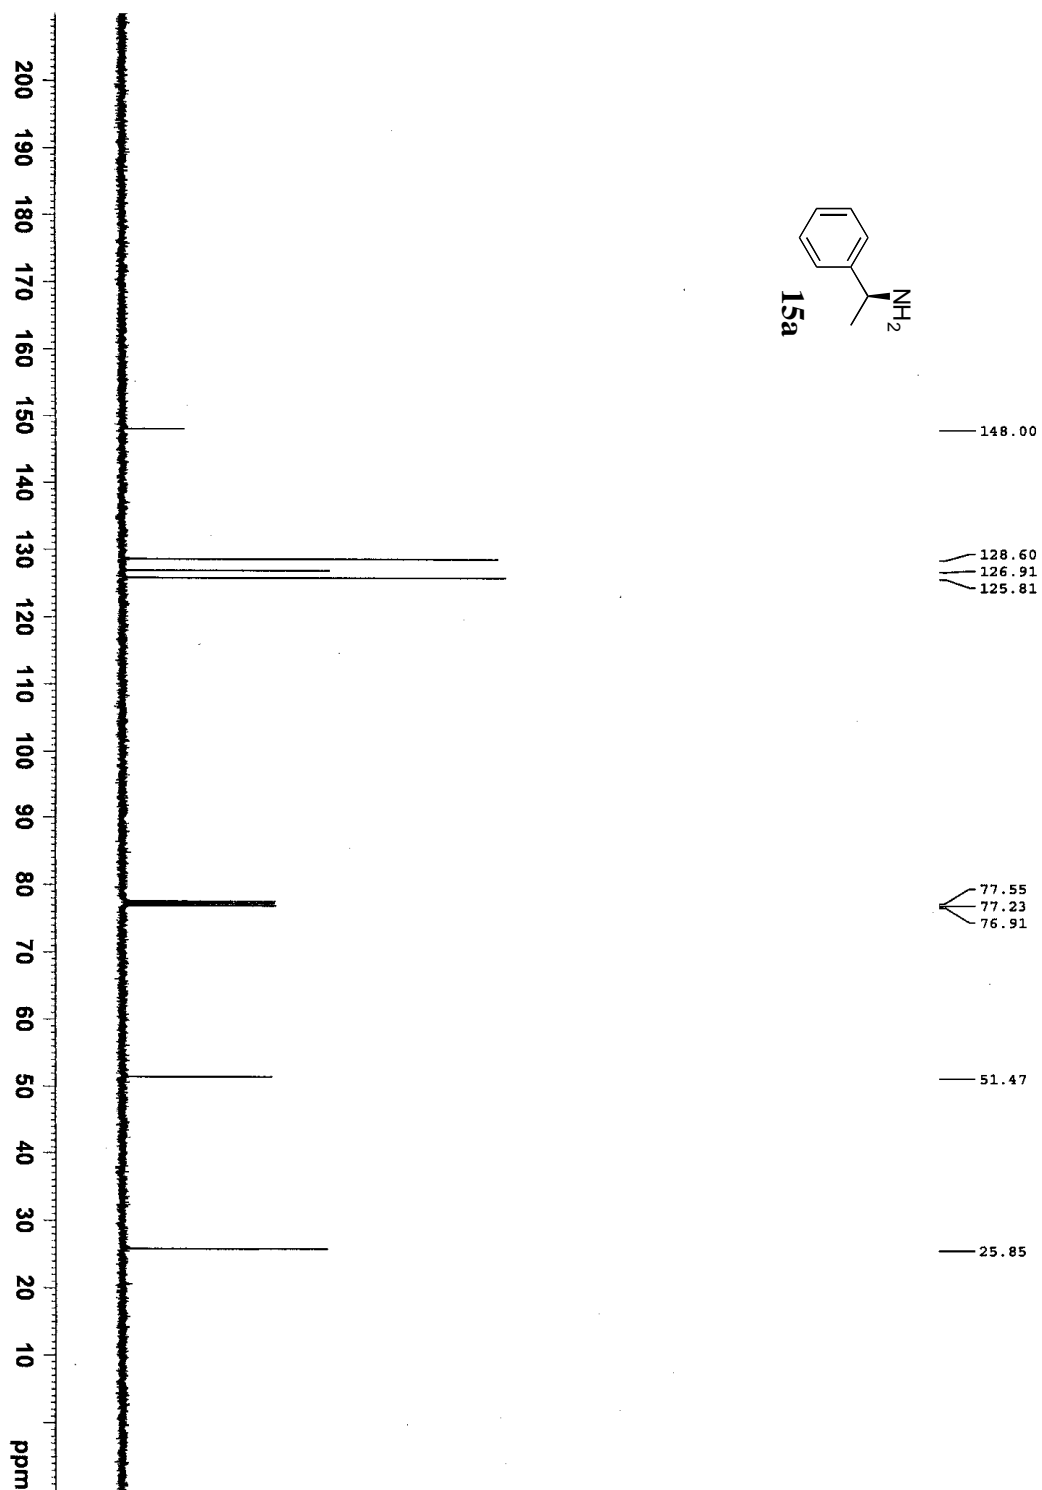

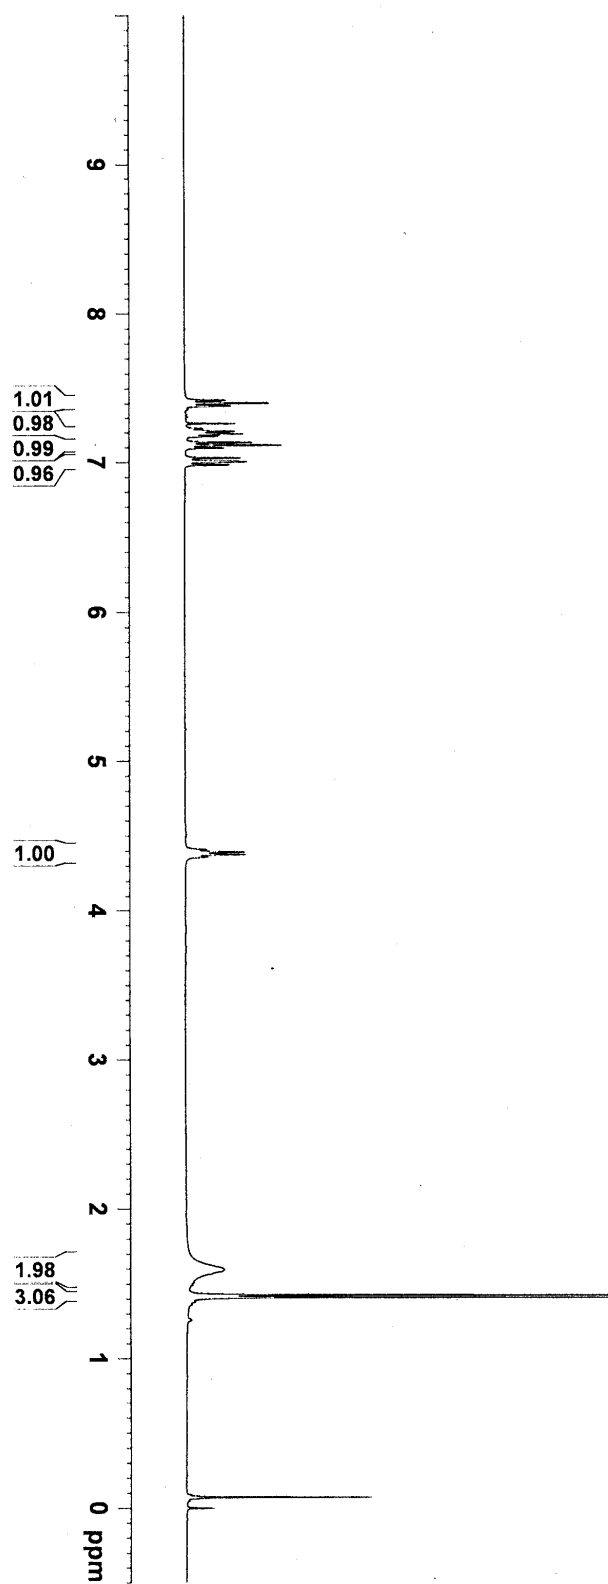

15b

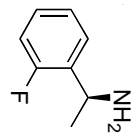

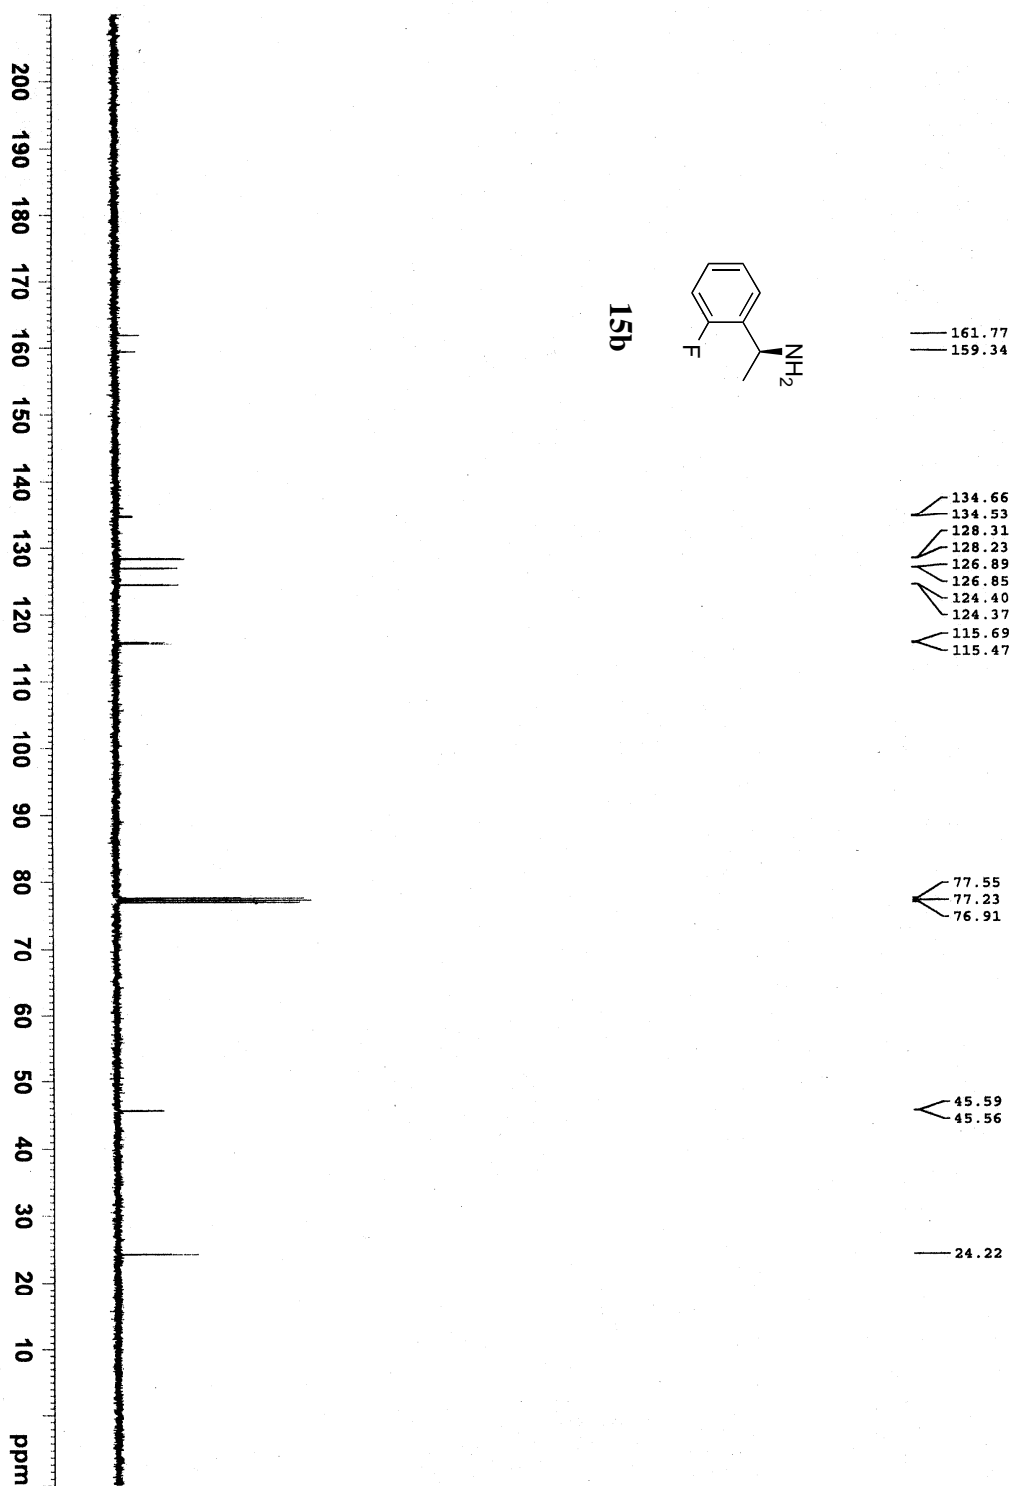

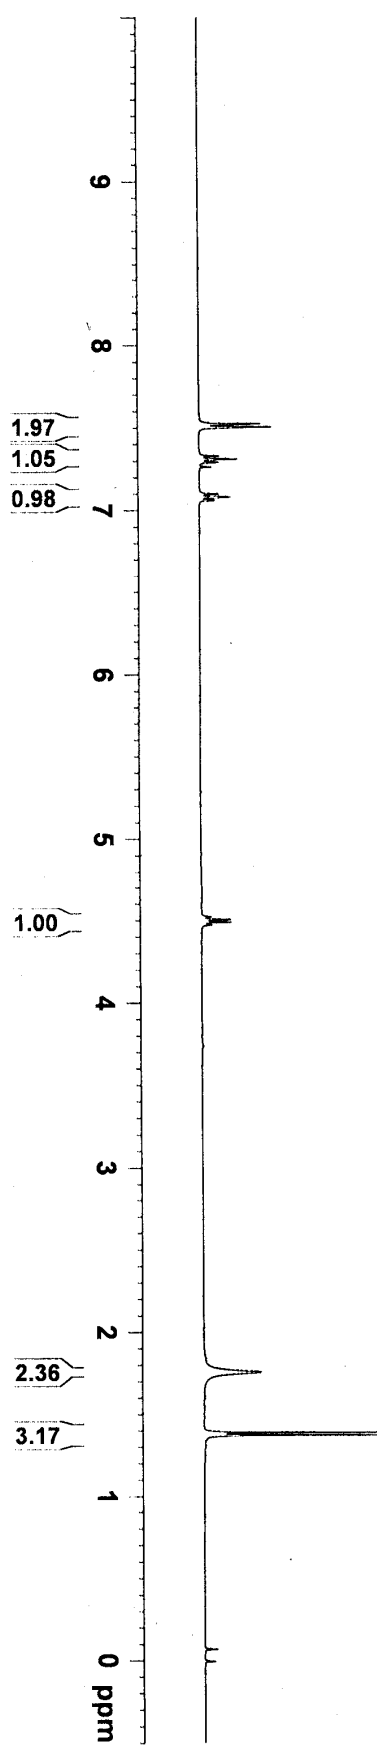

15c

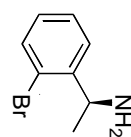

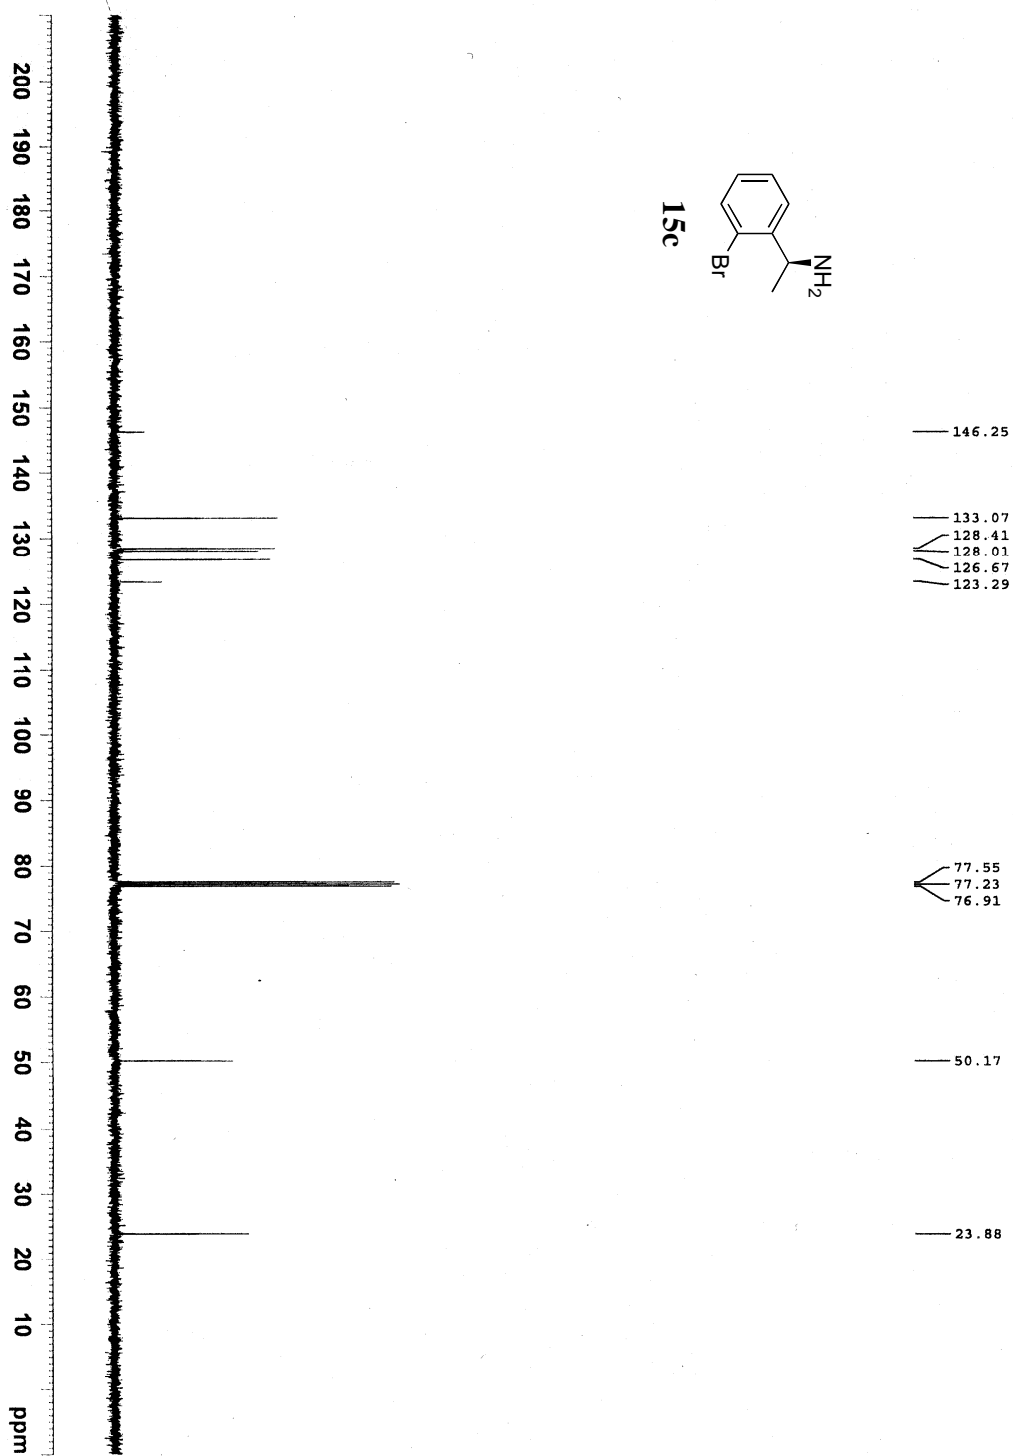



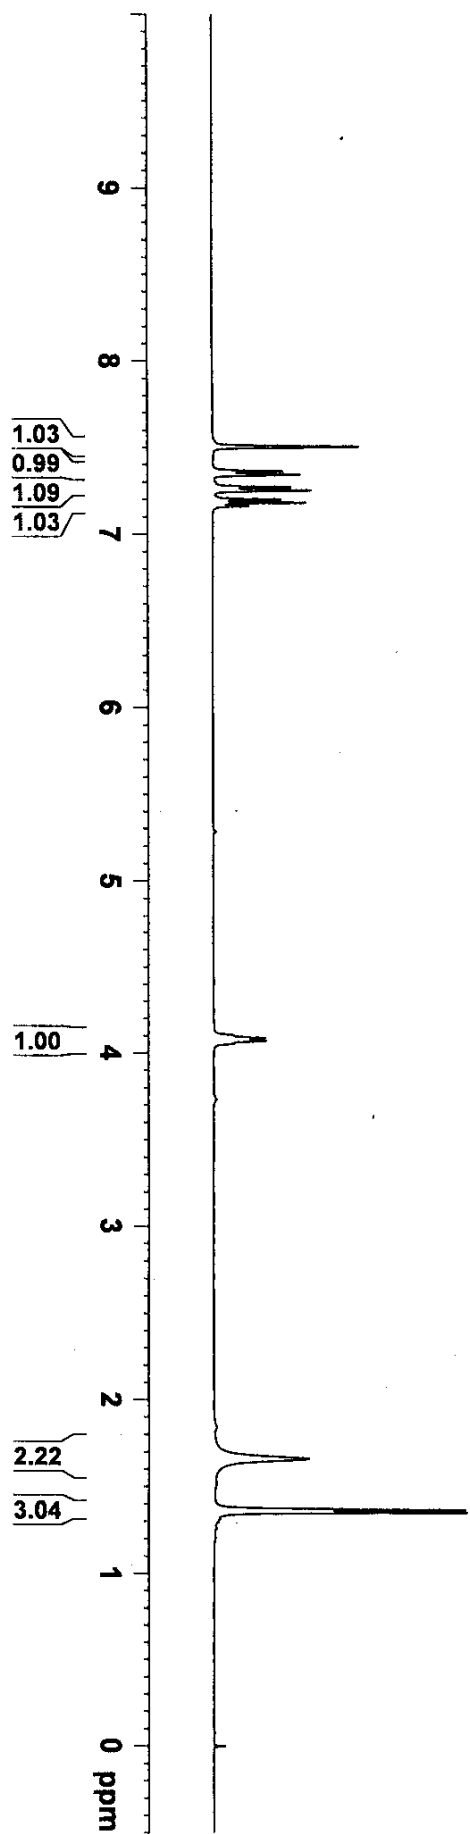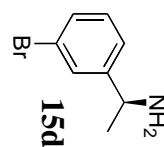

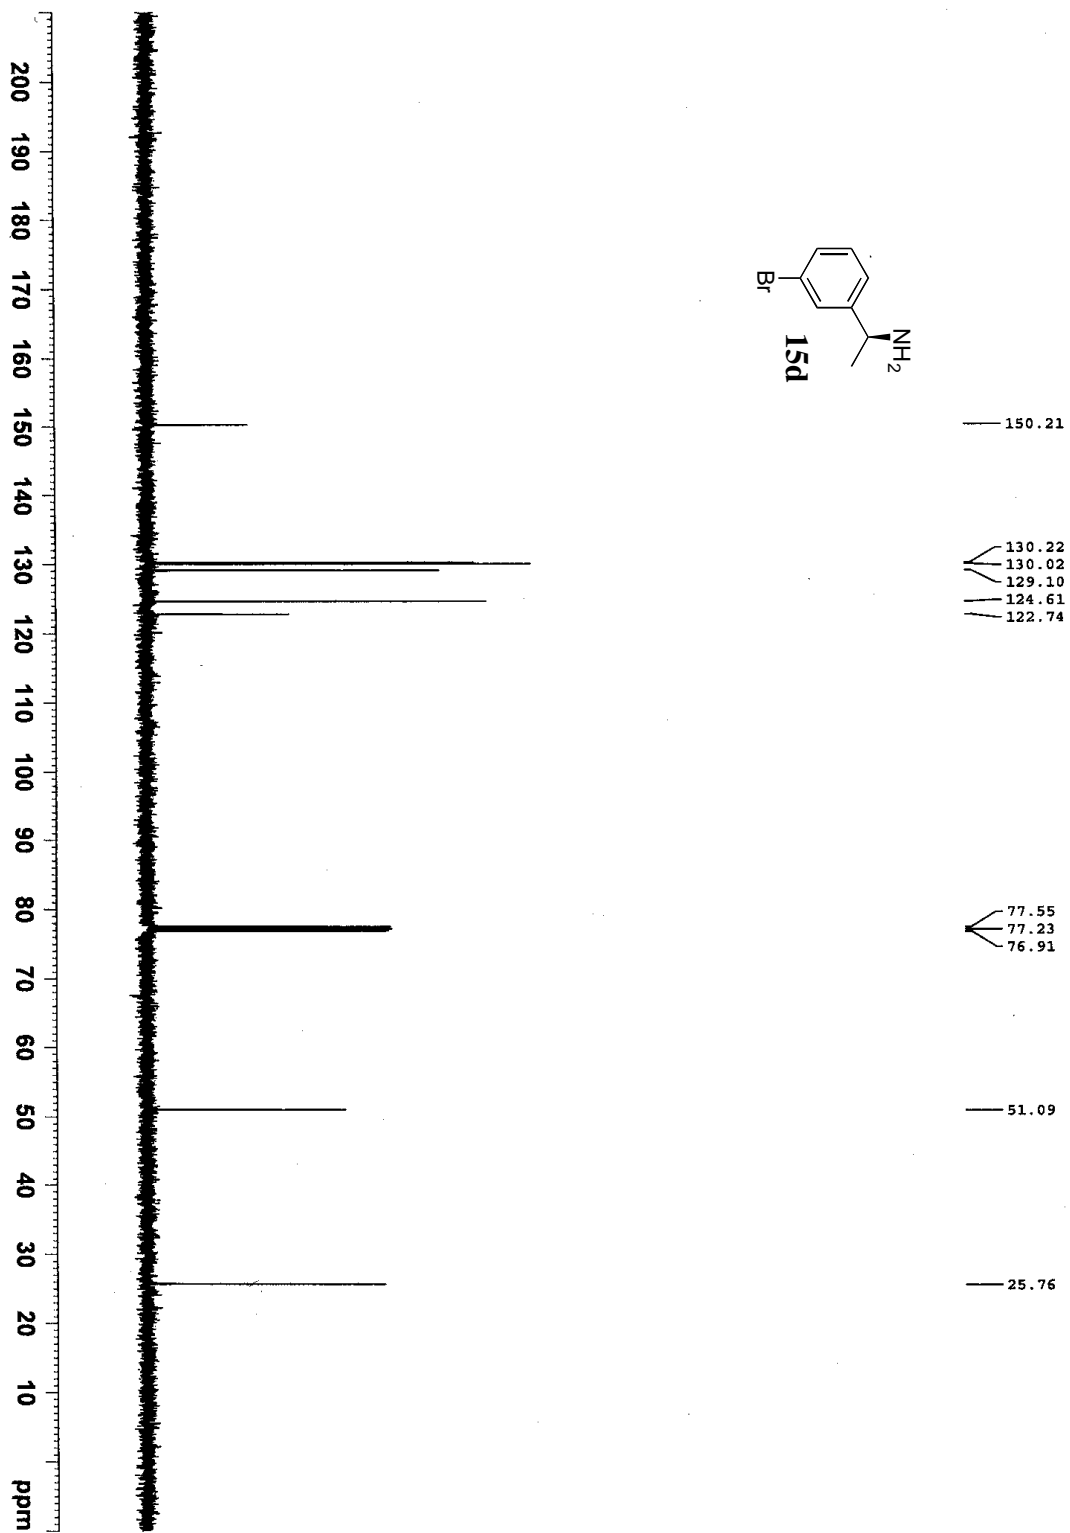

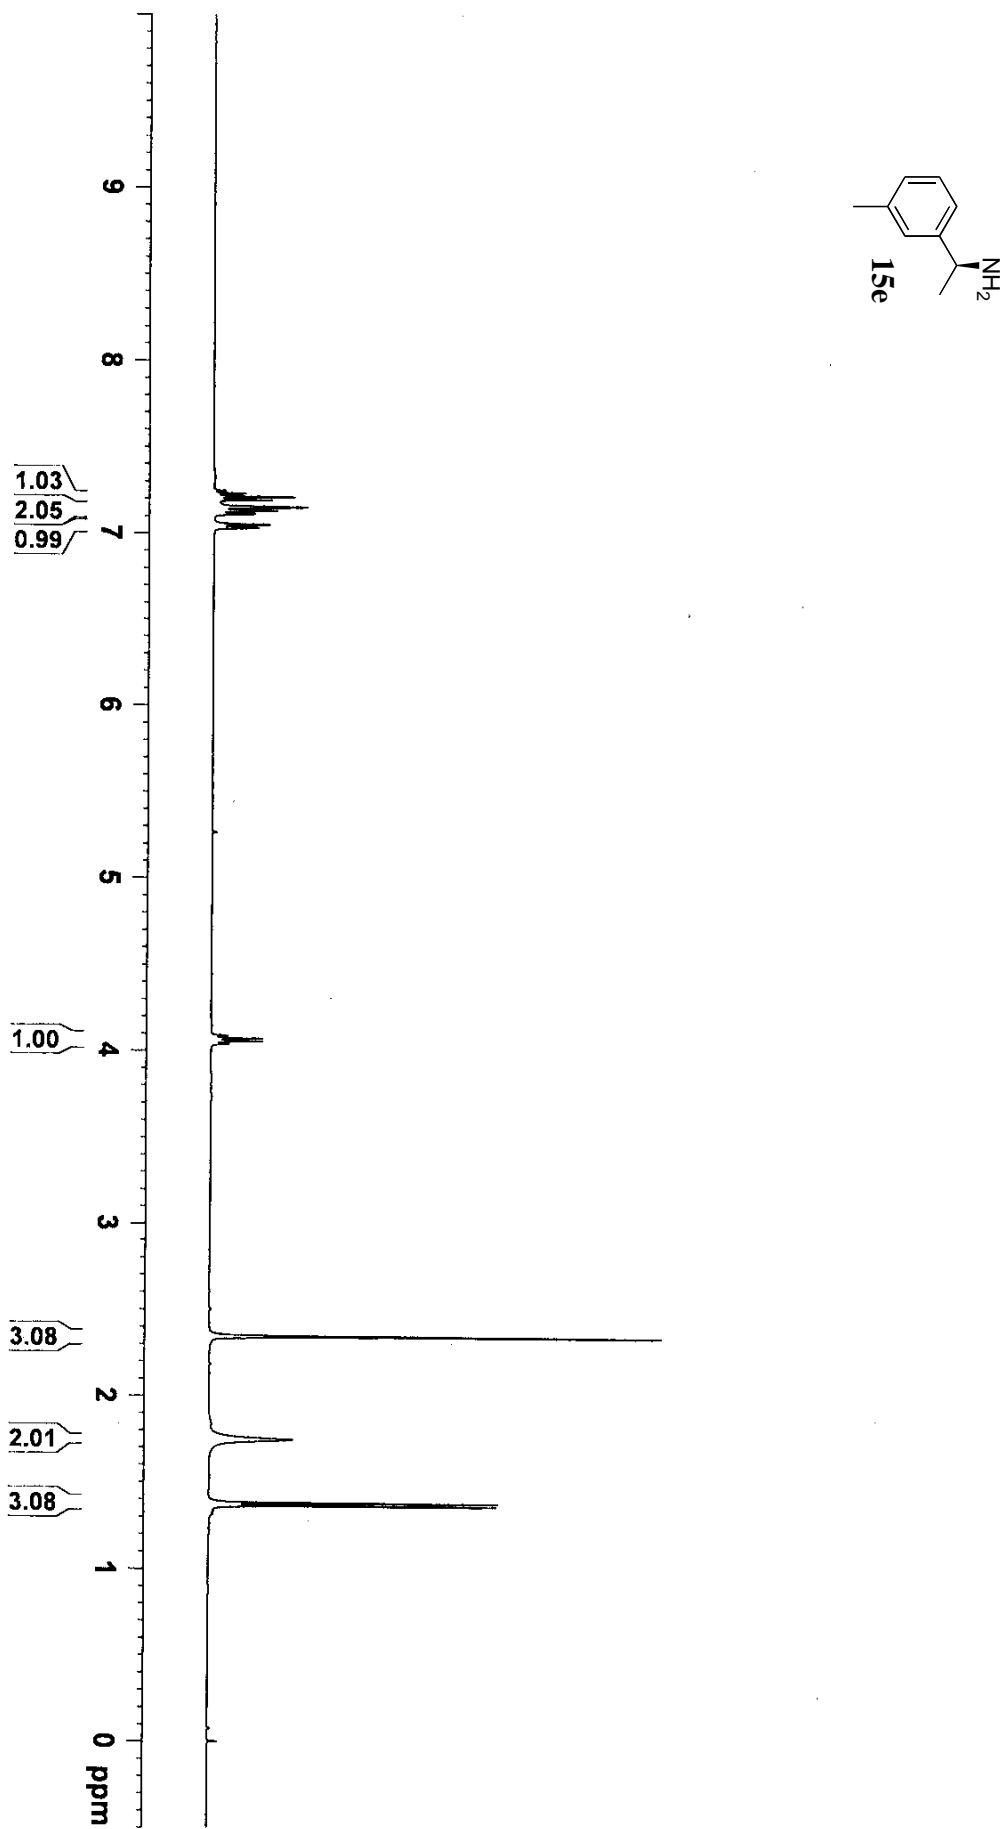

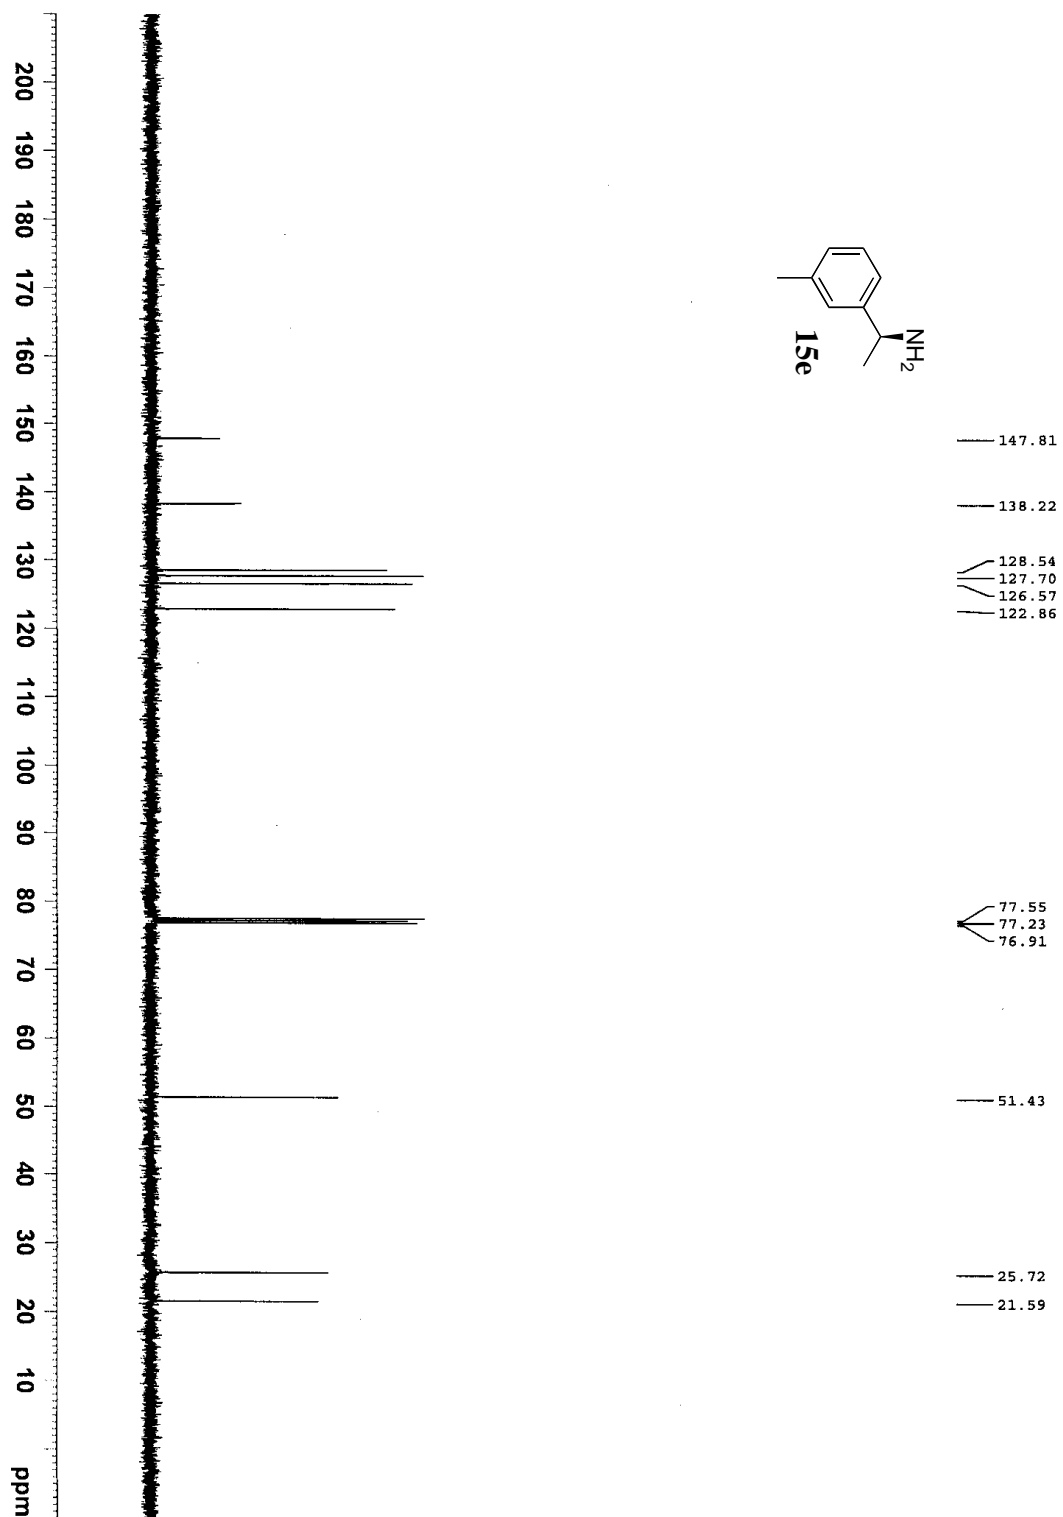

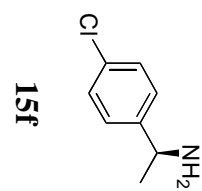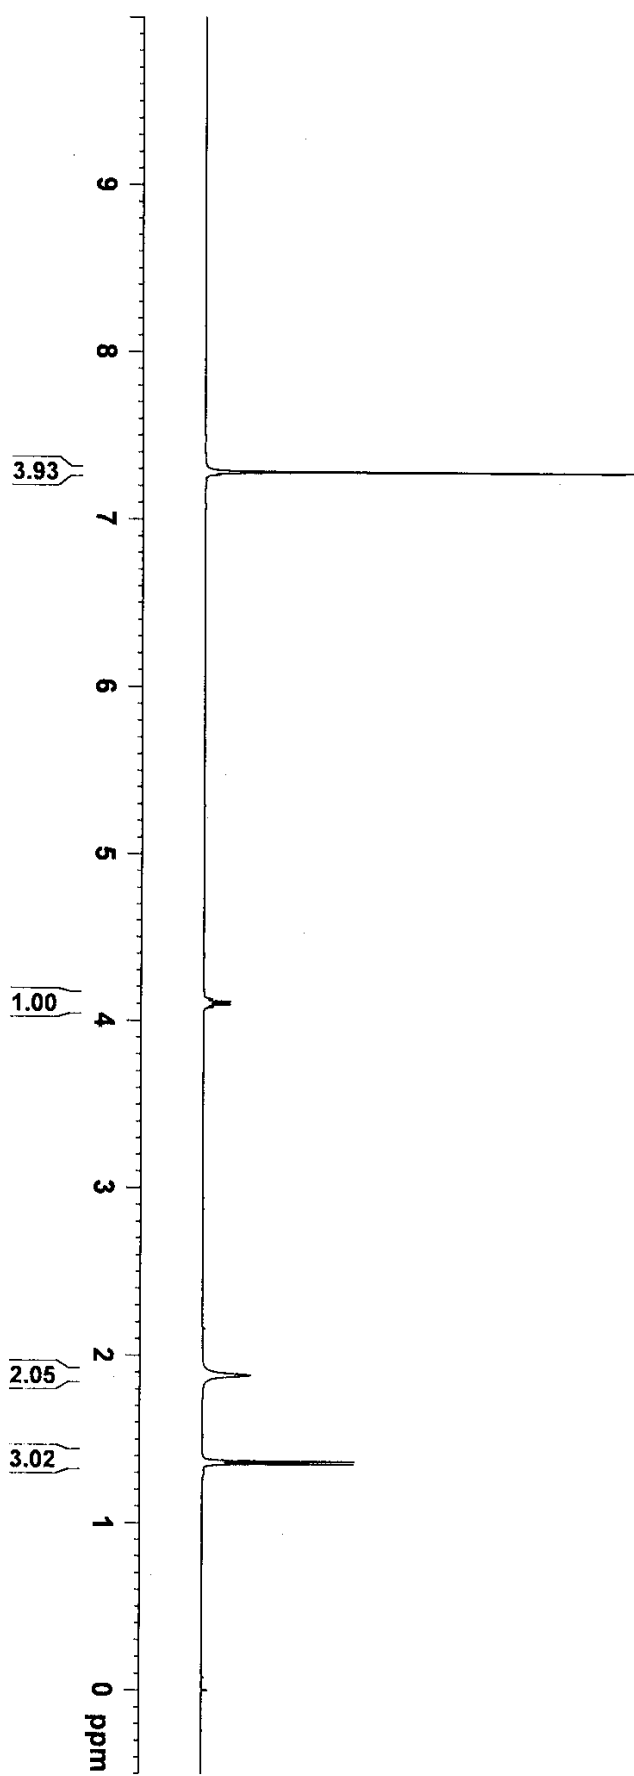

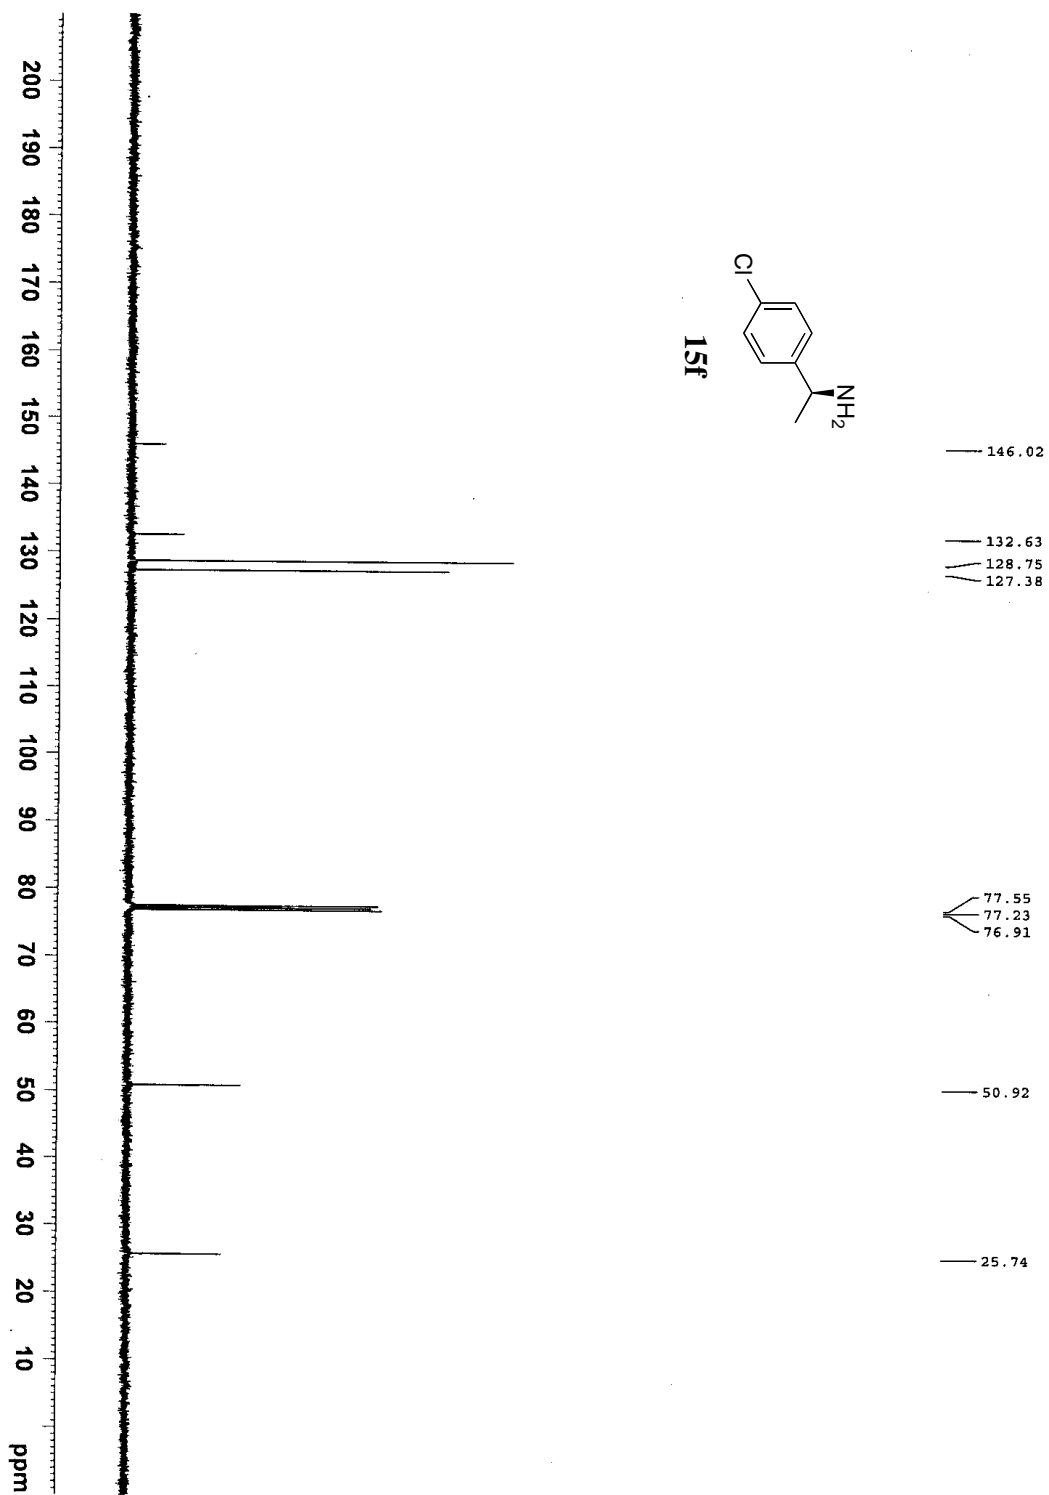

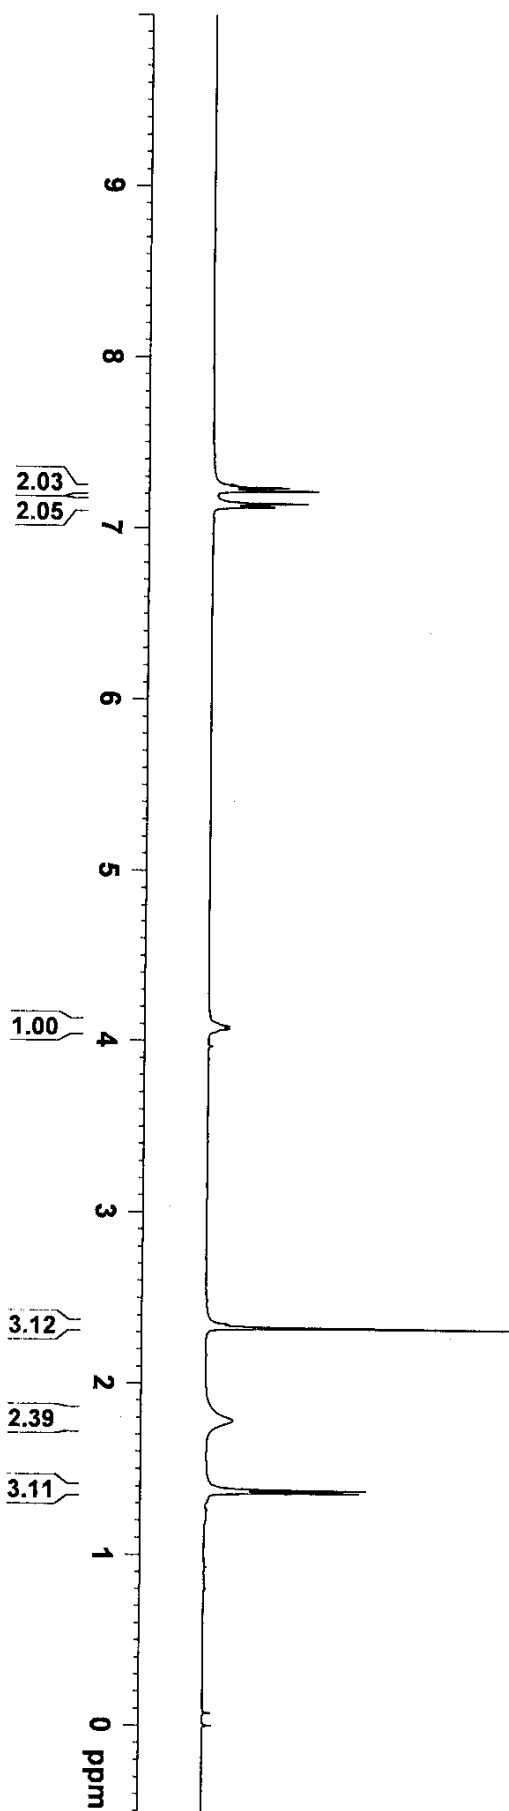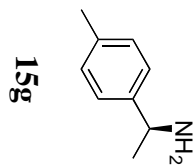

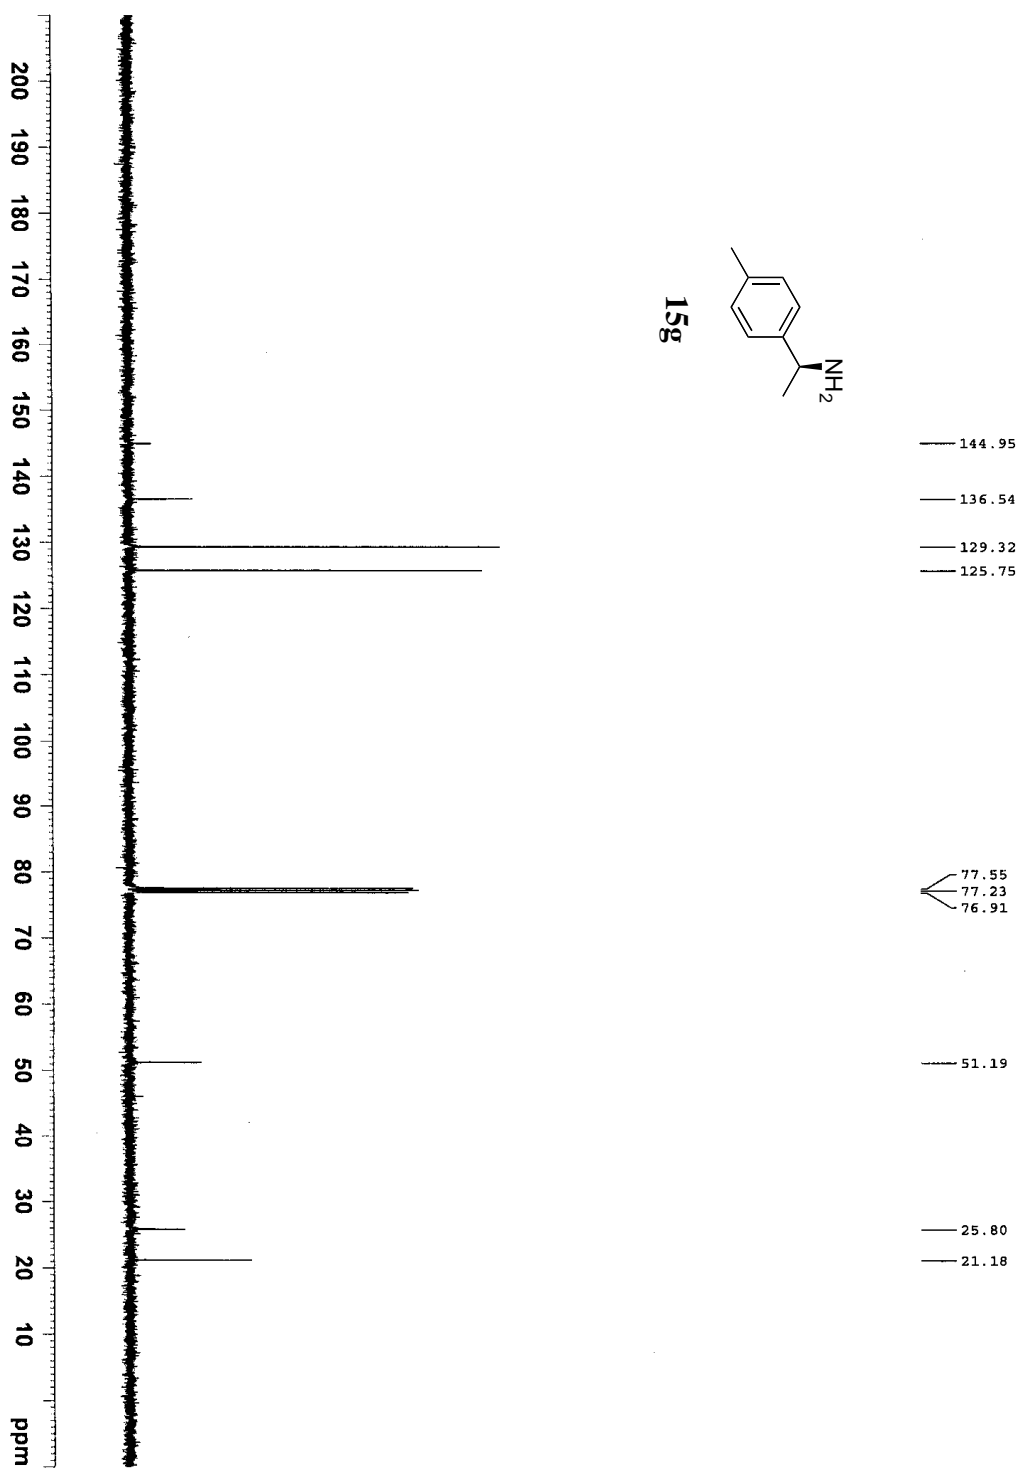



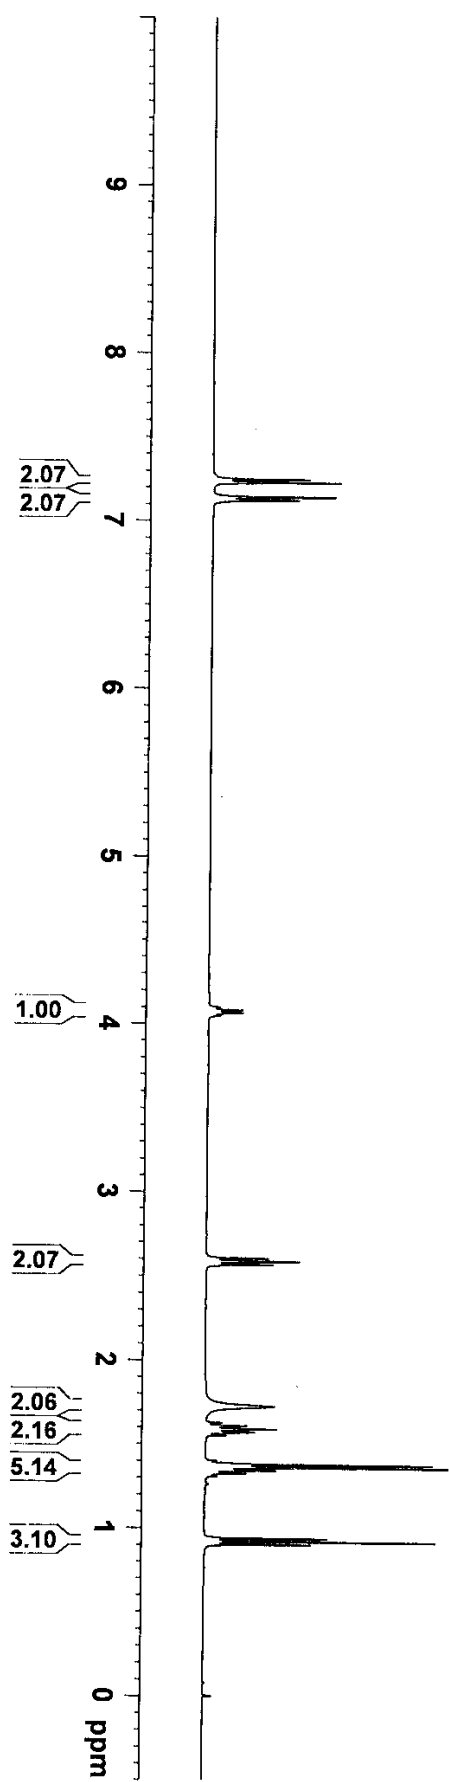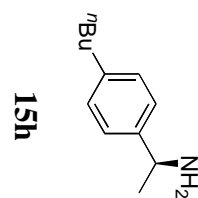

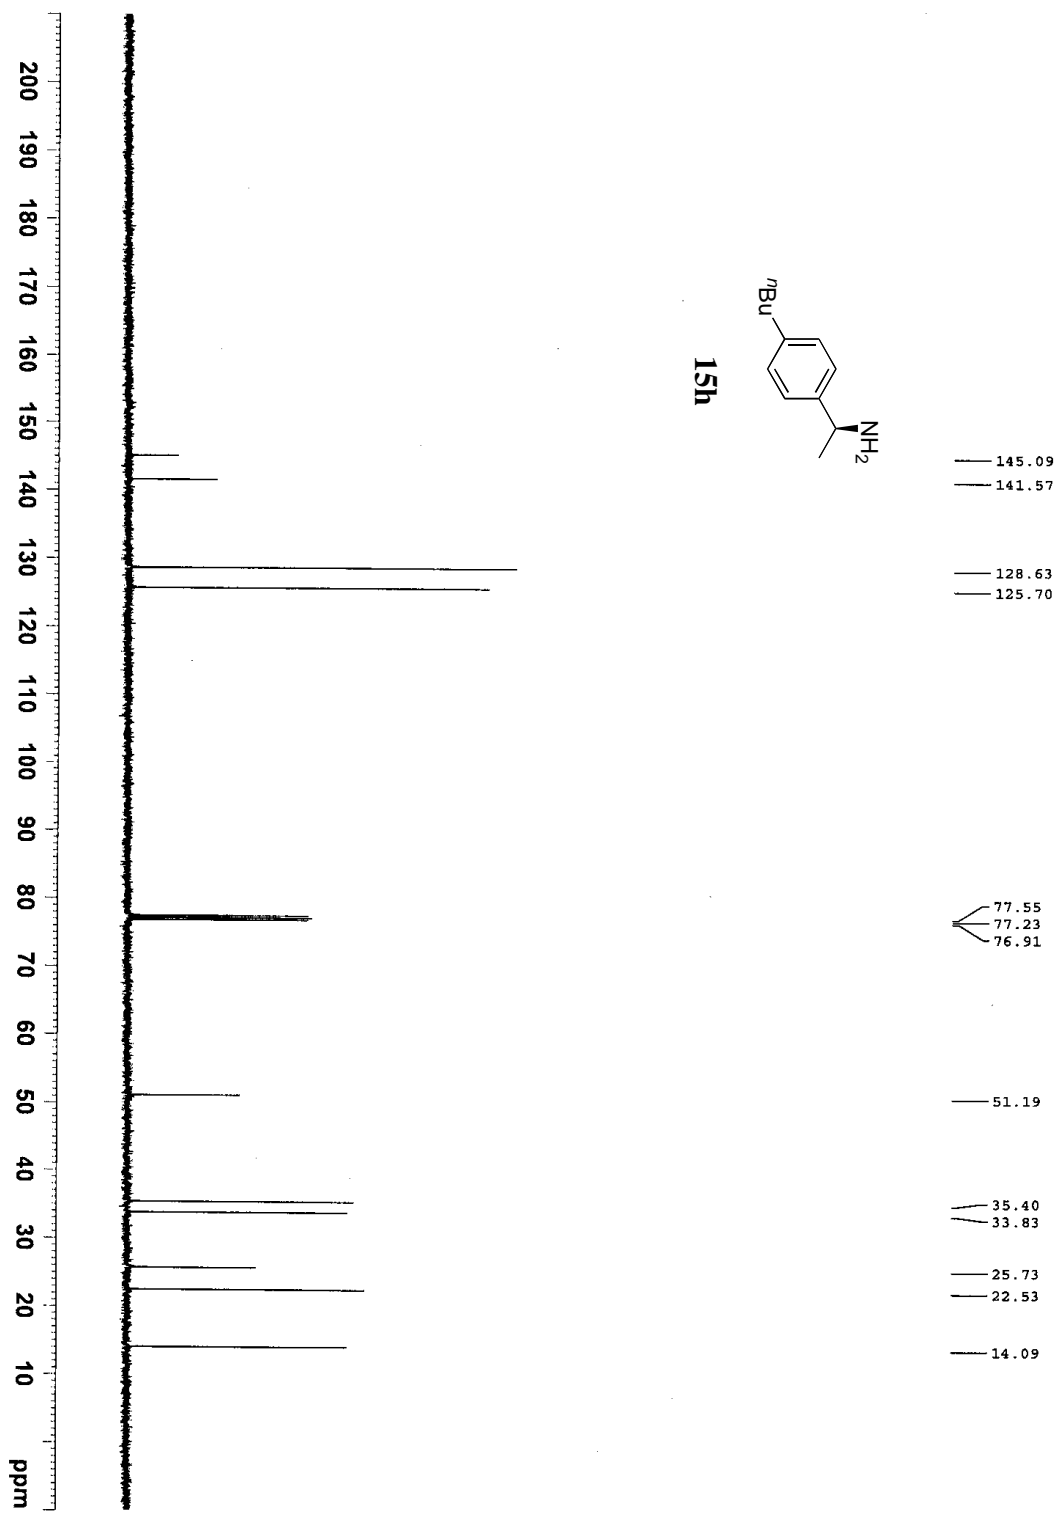

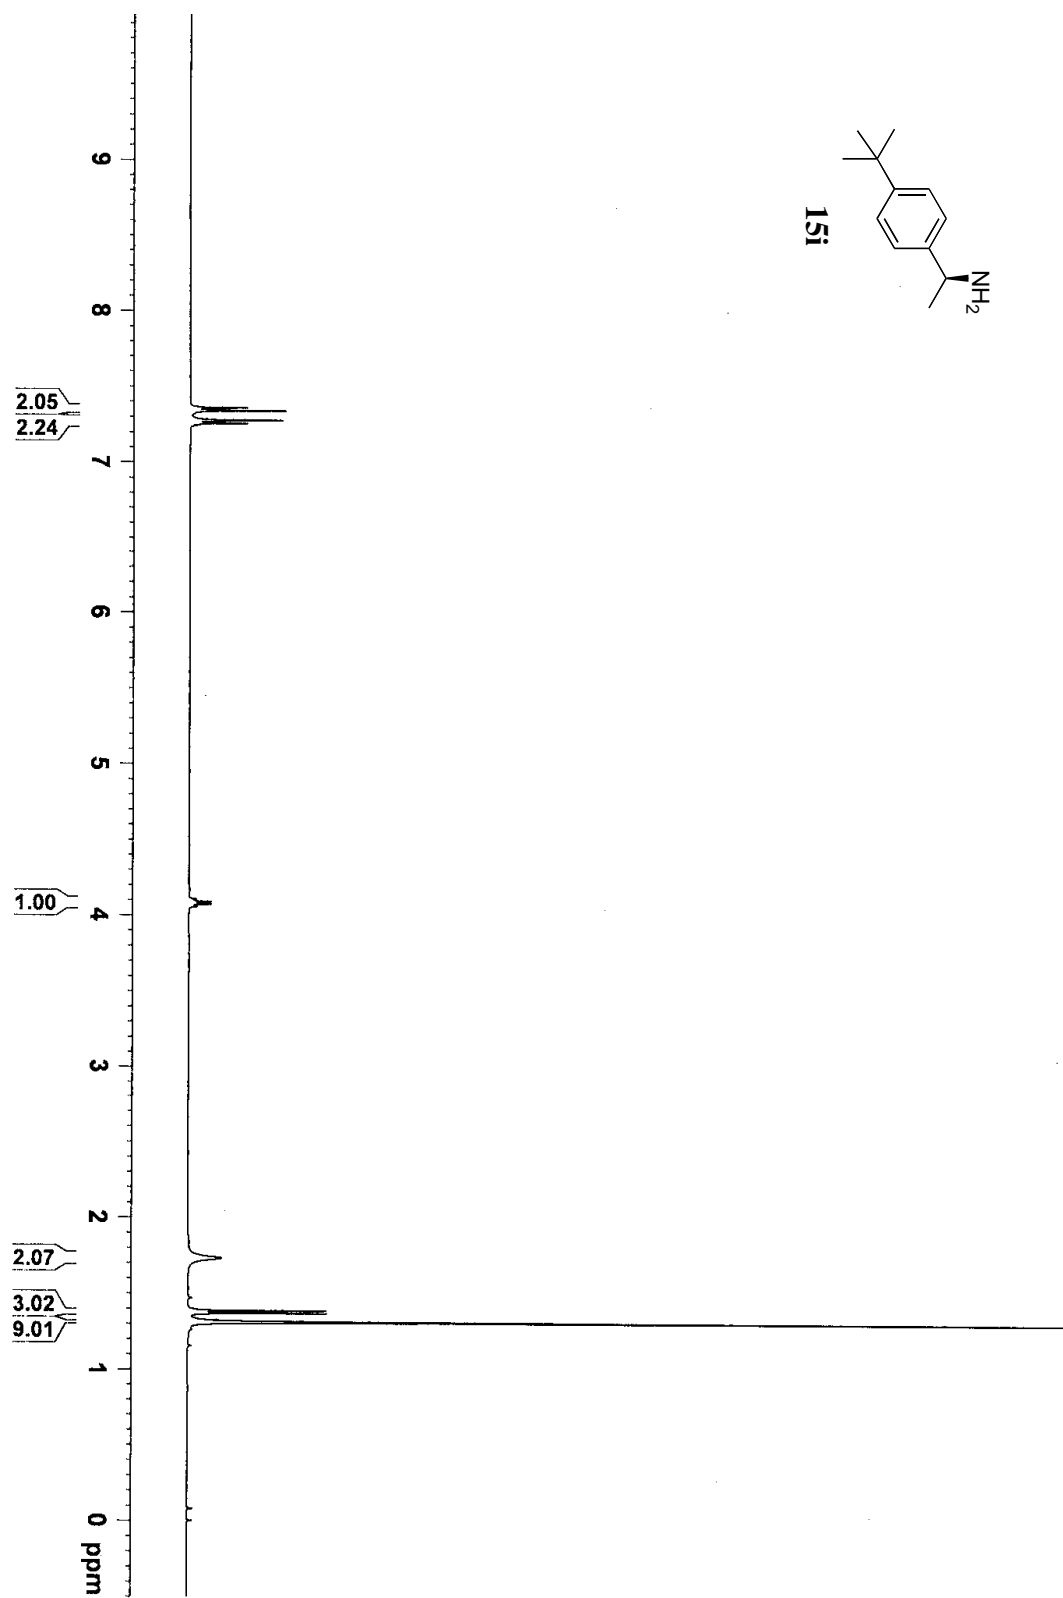

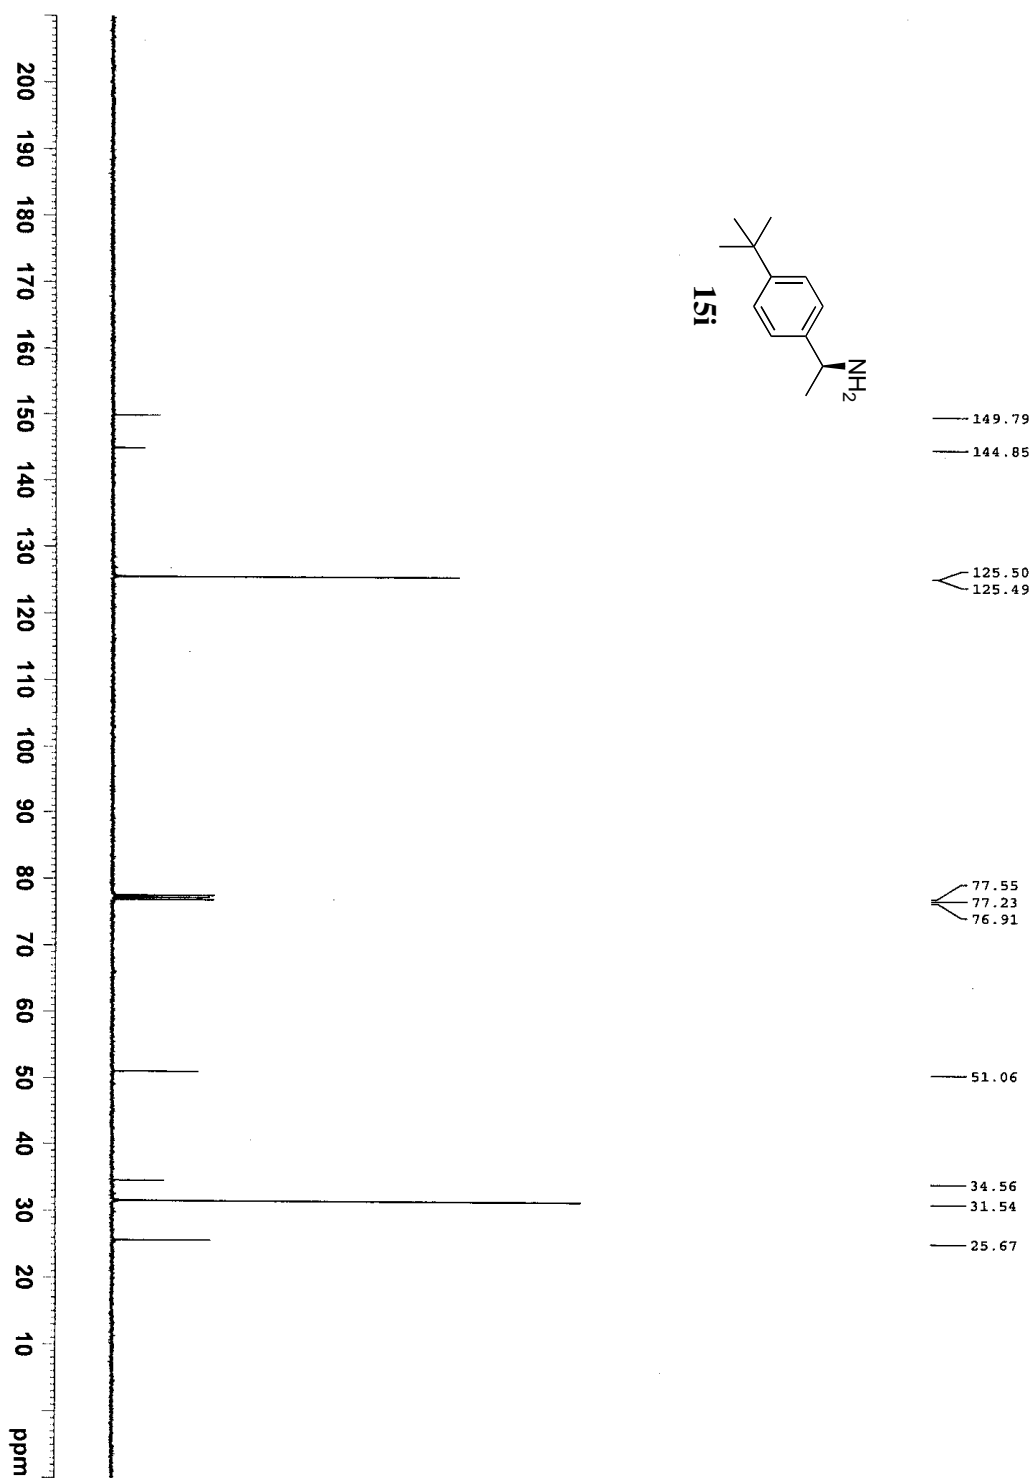

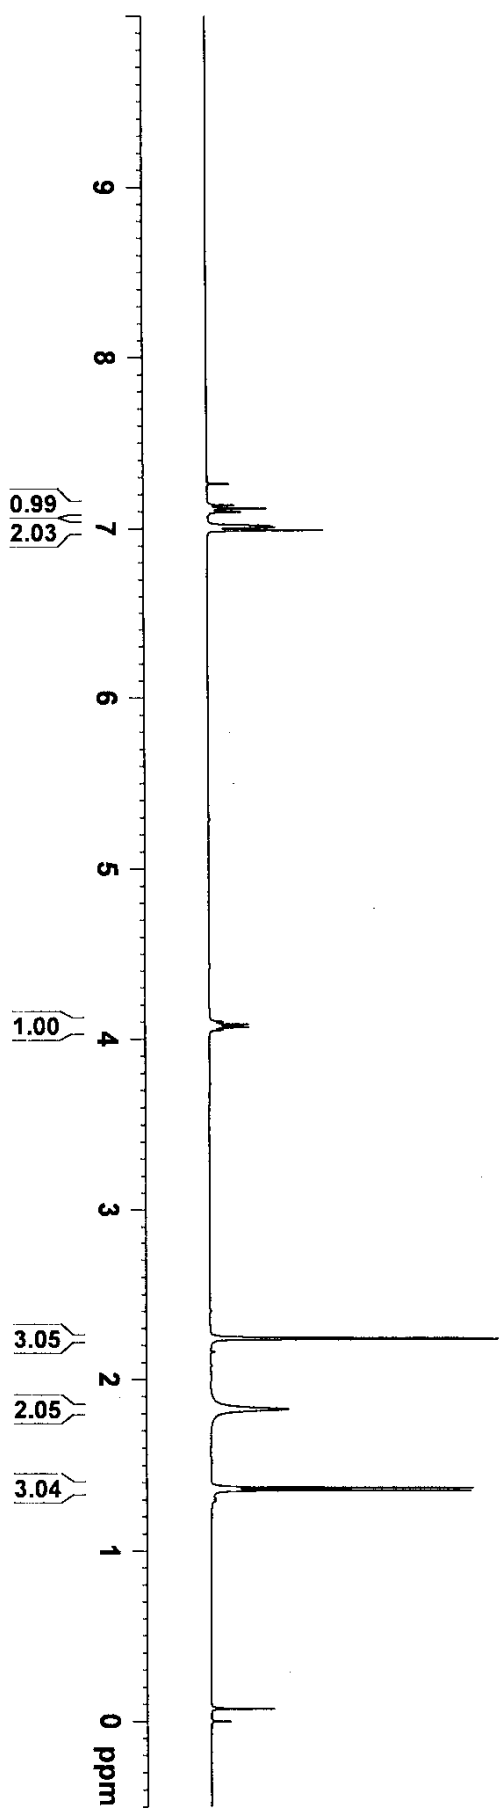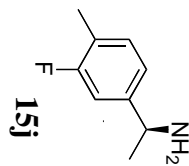

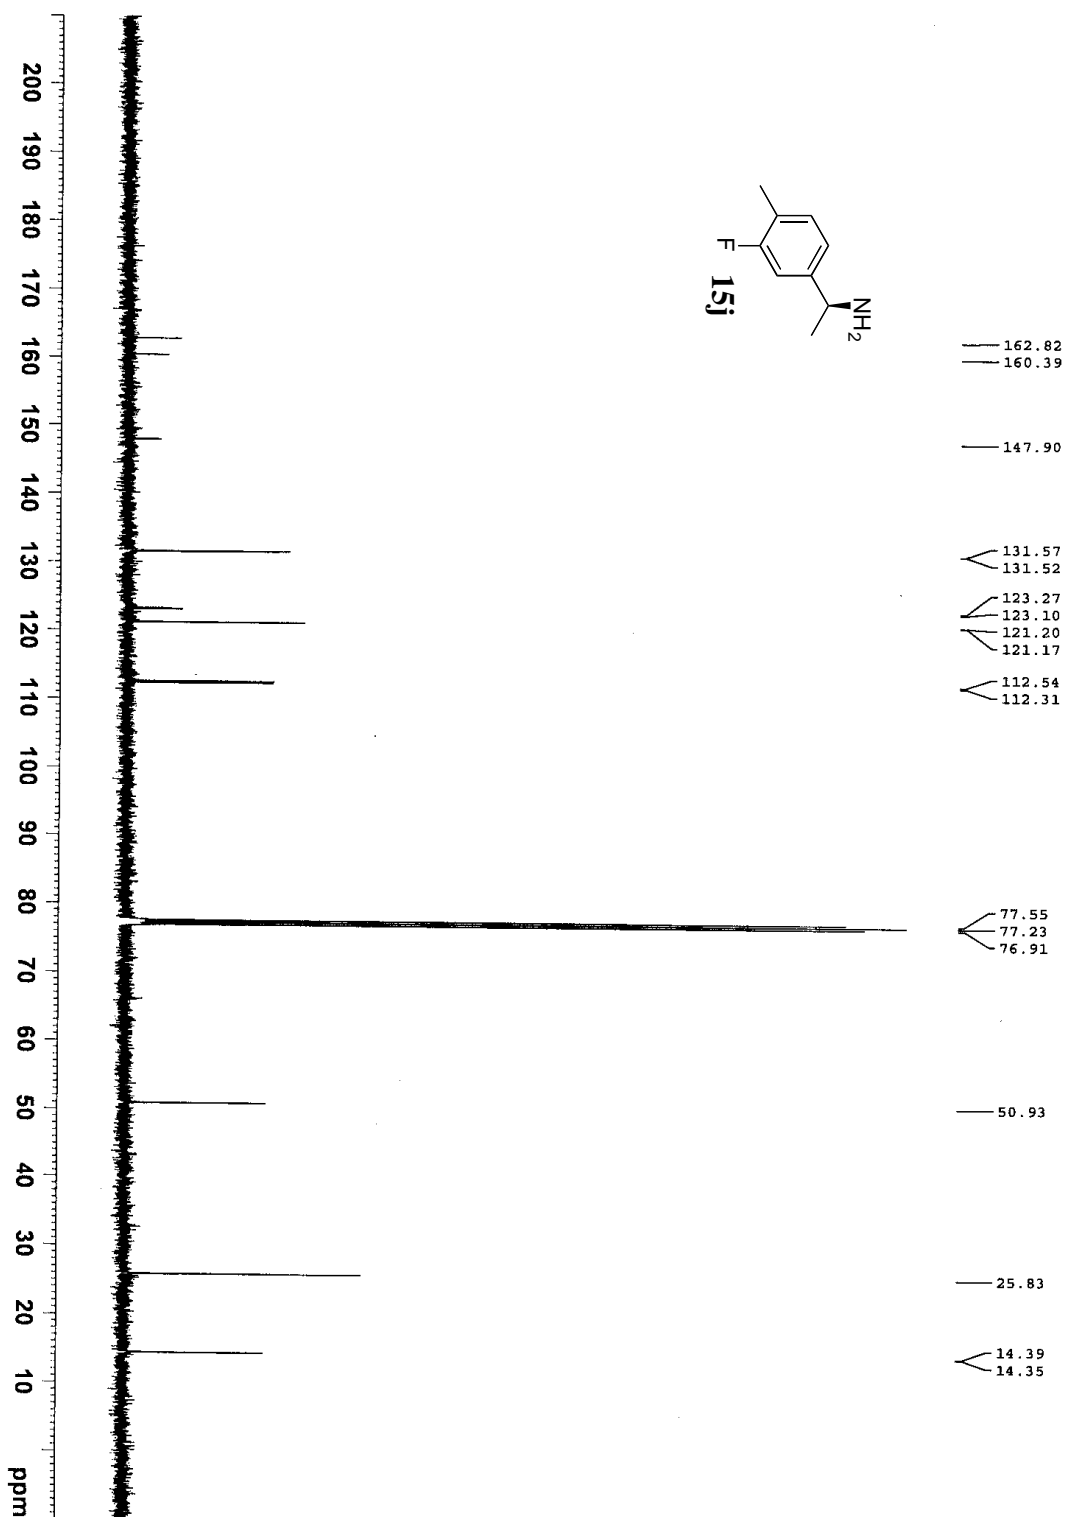

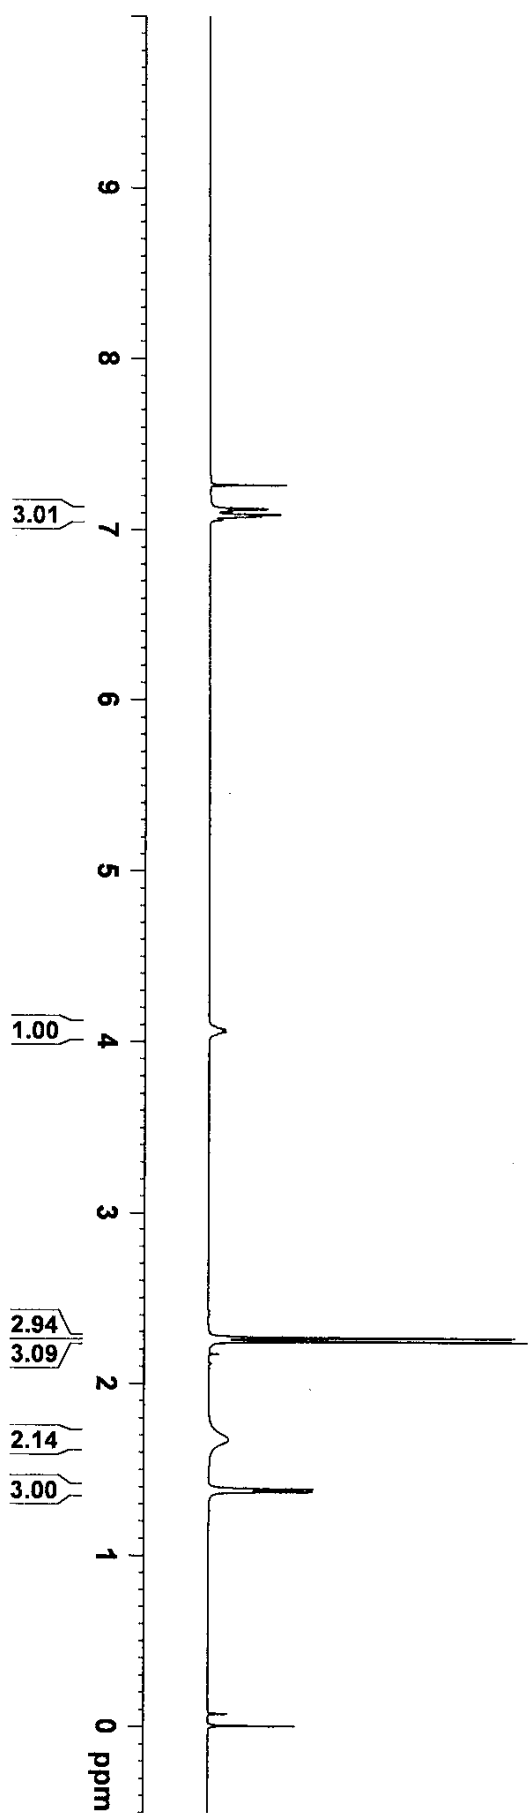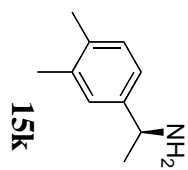

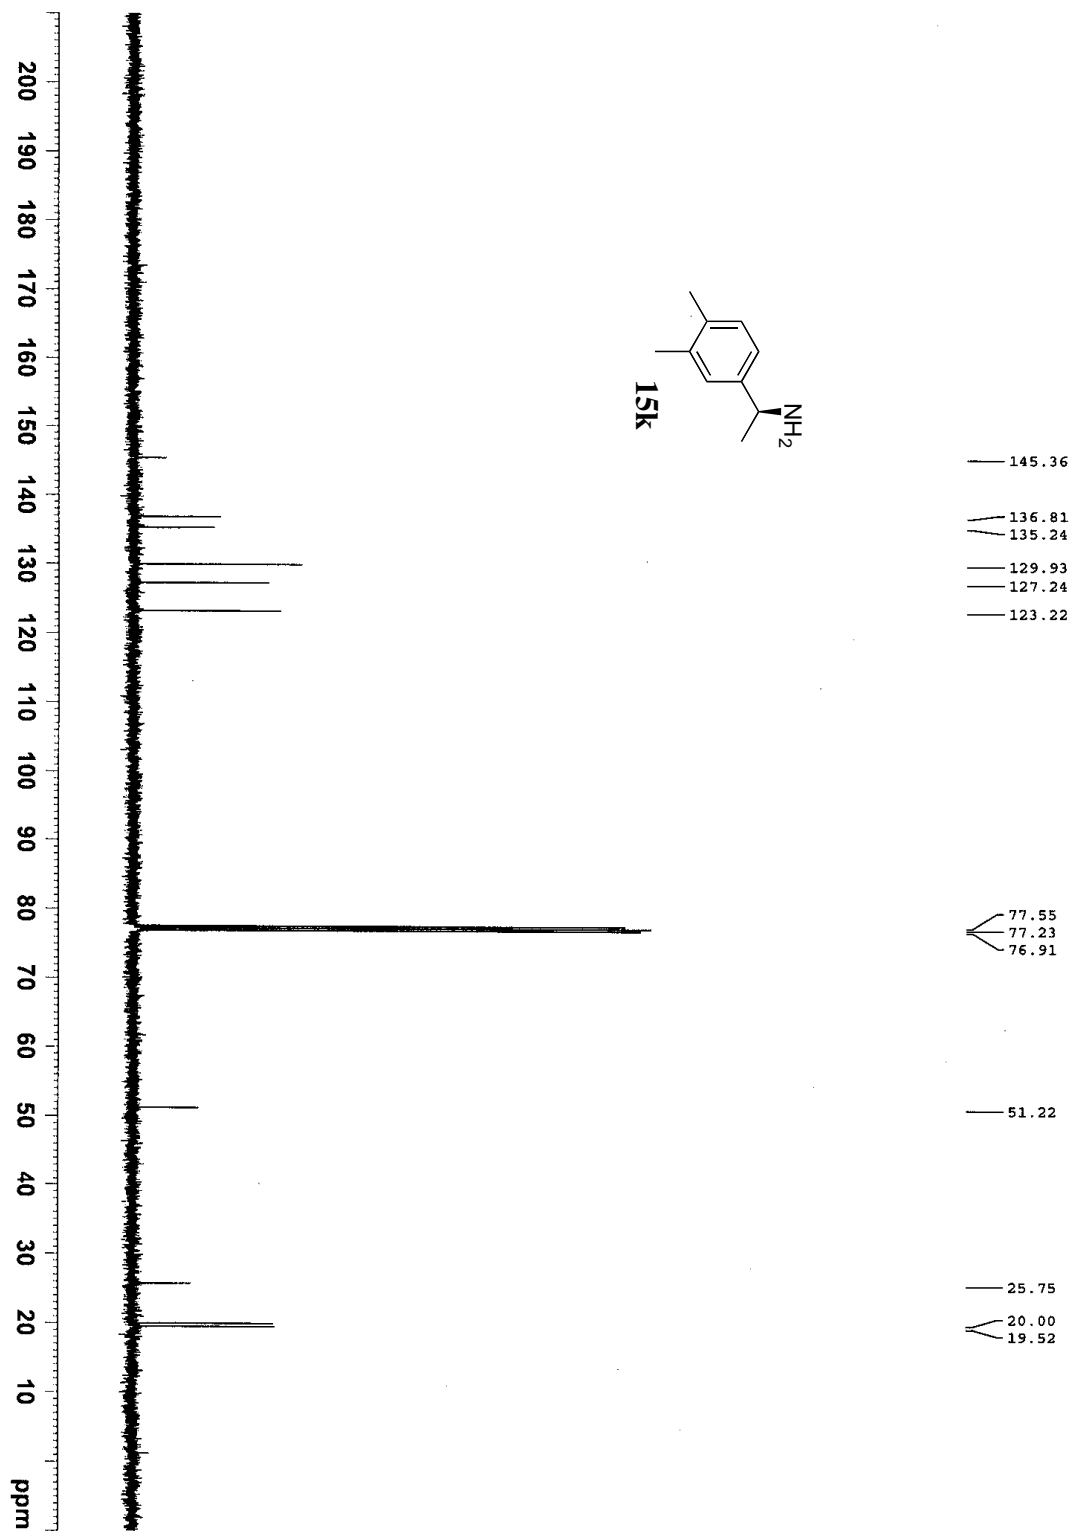



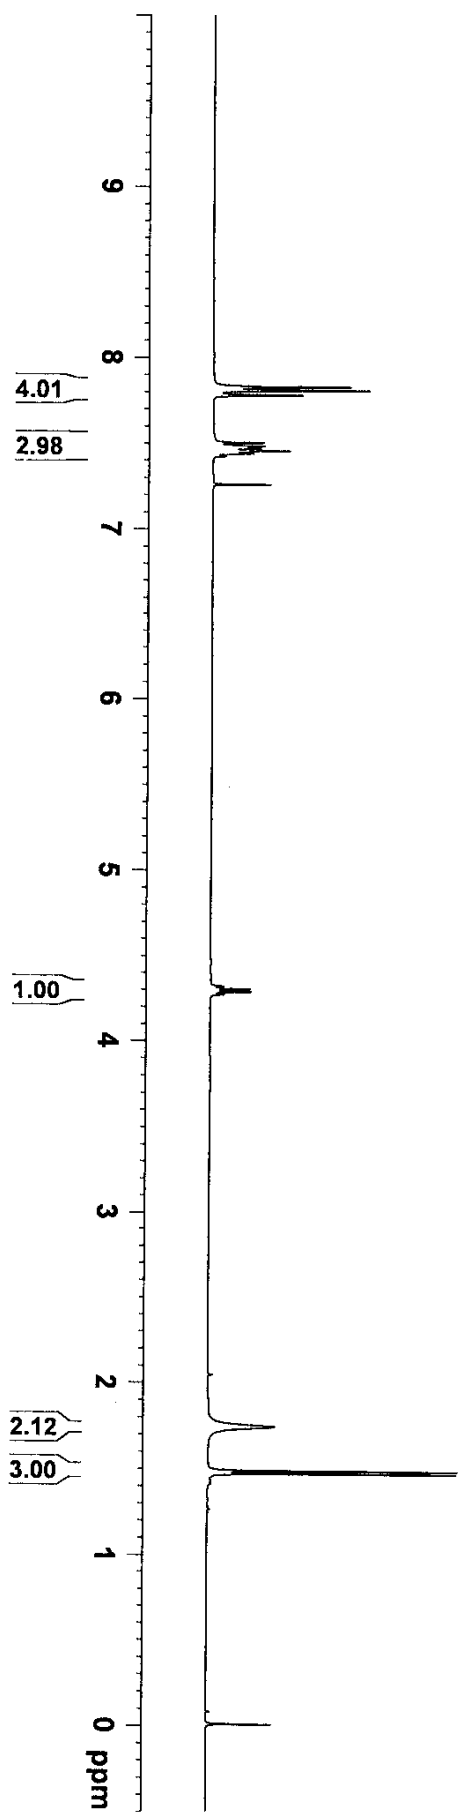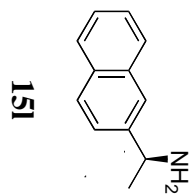

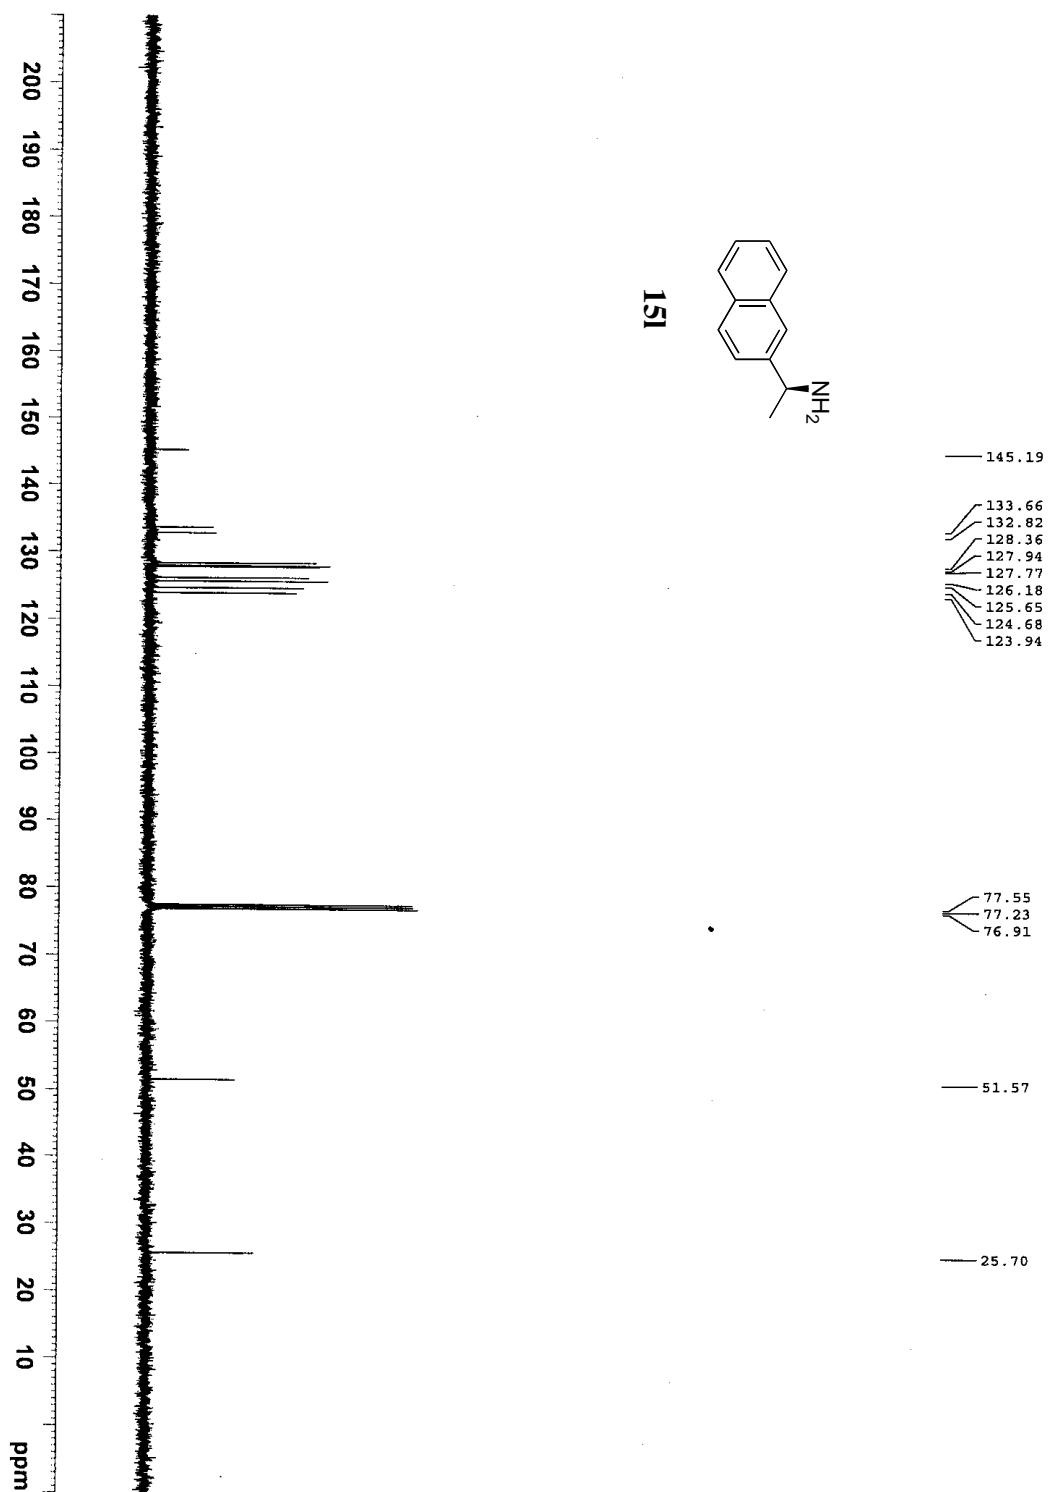

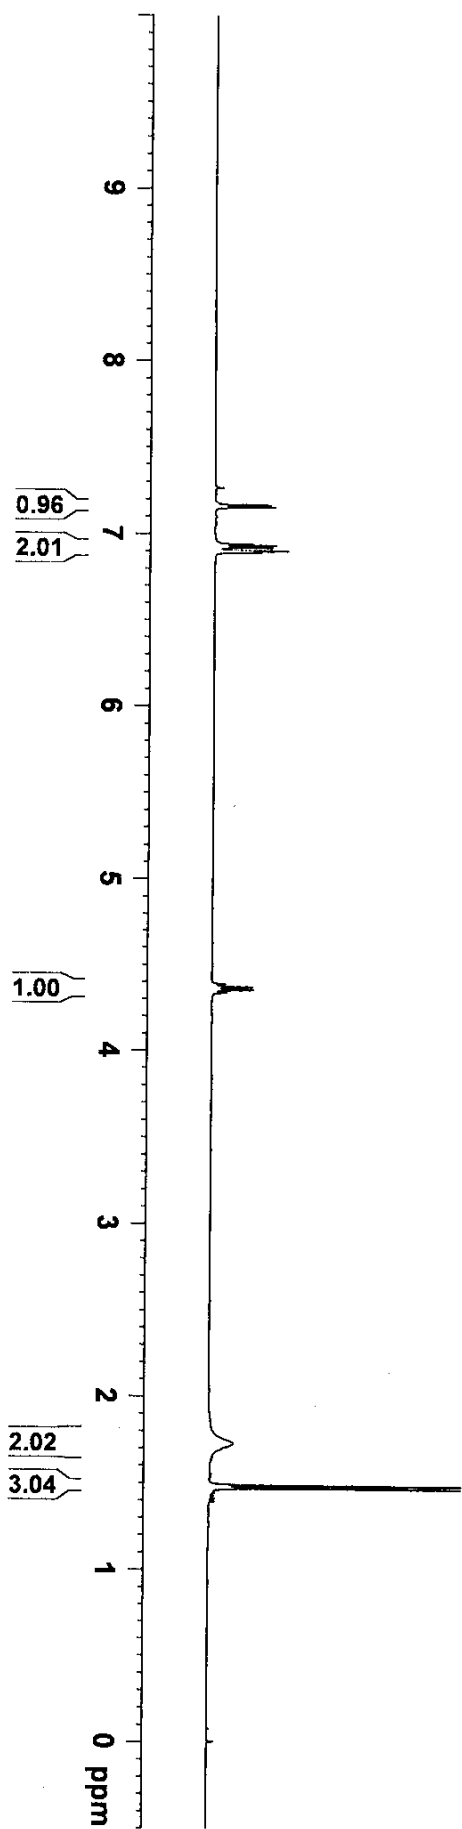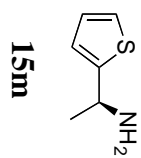

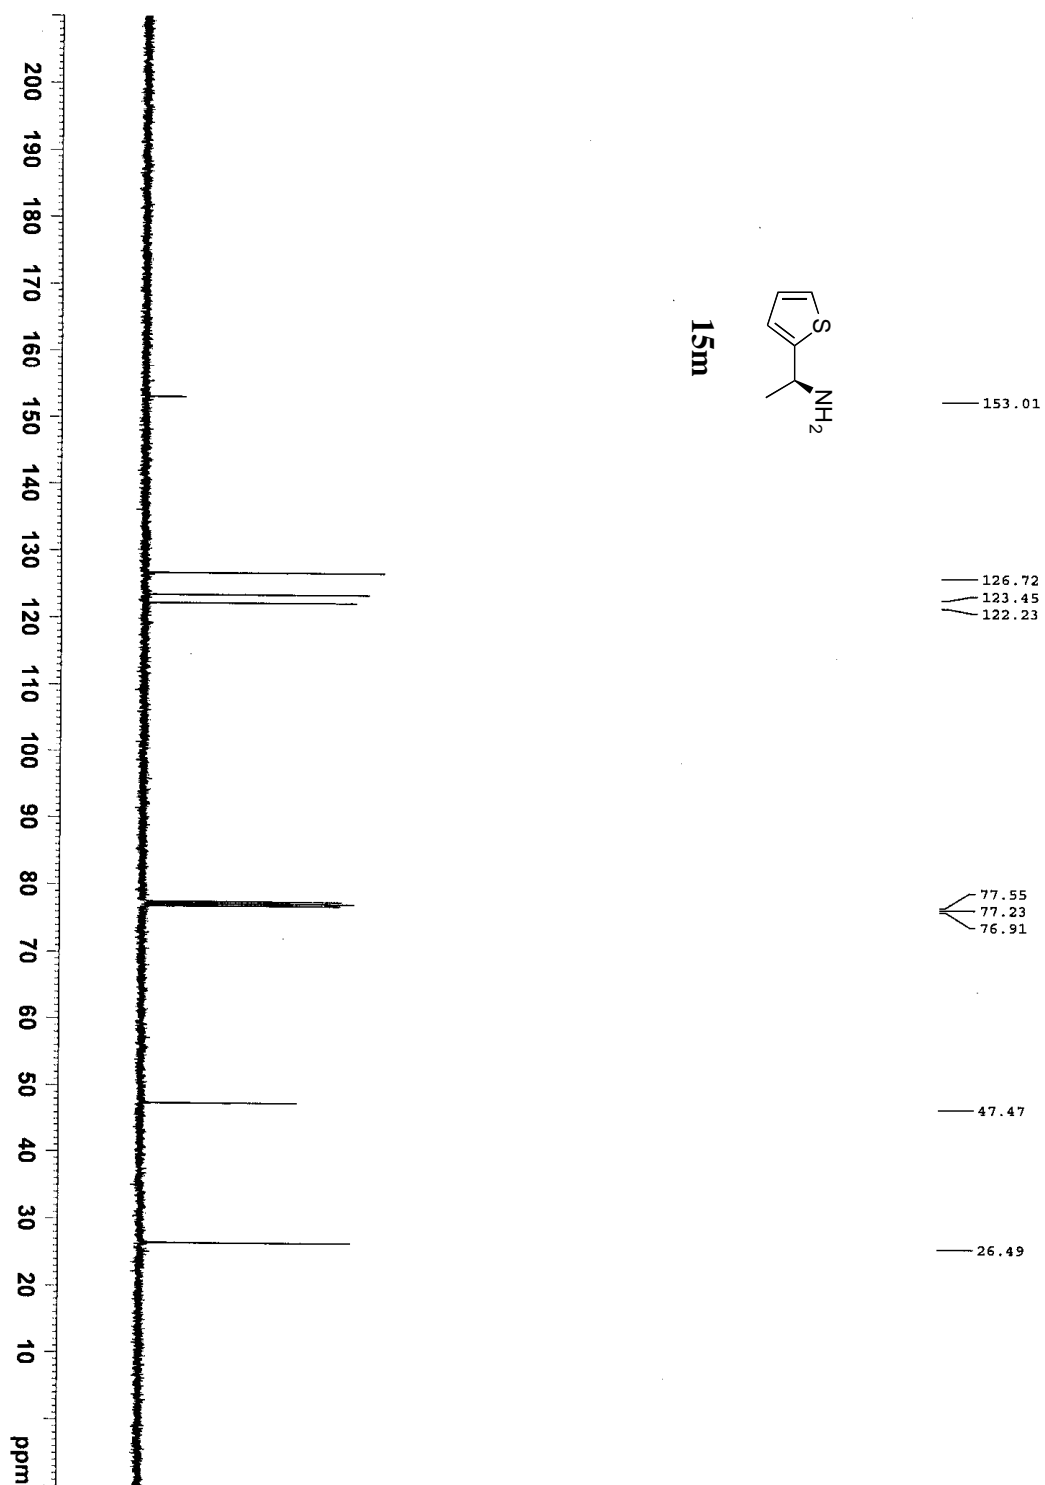

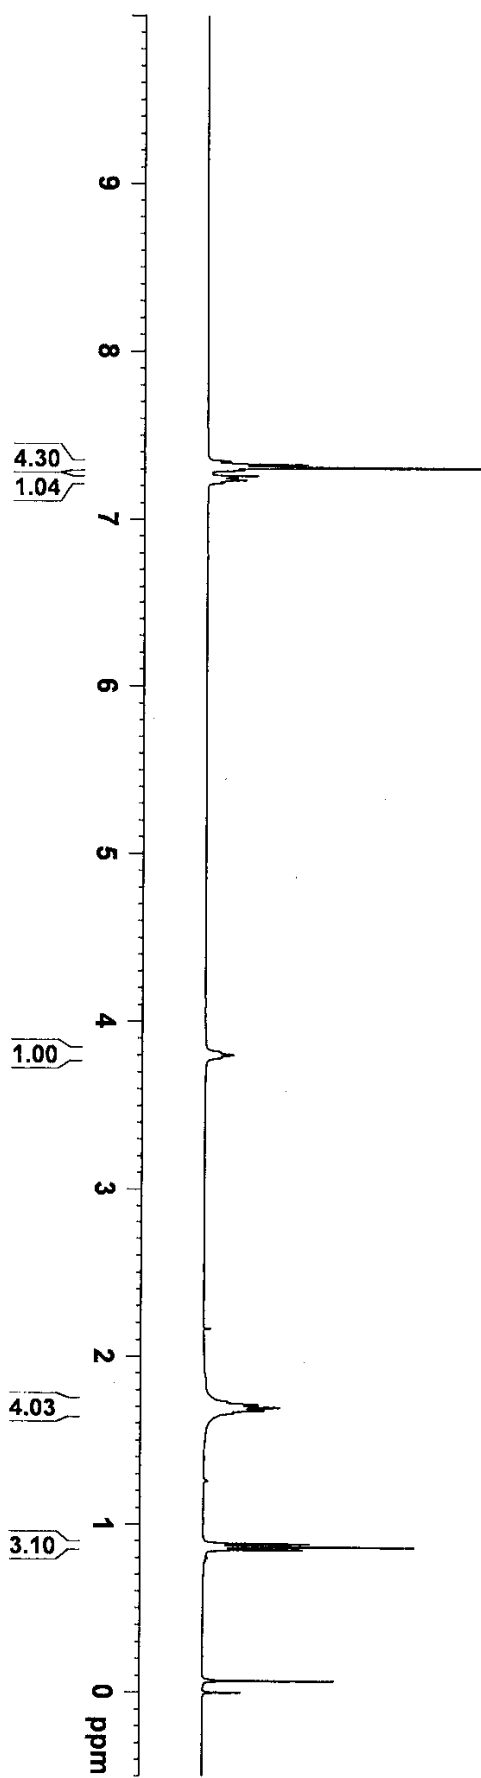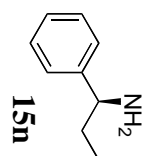

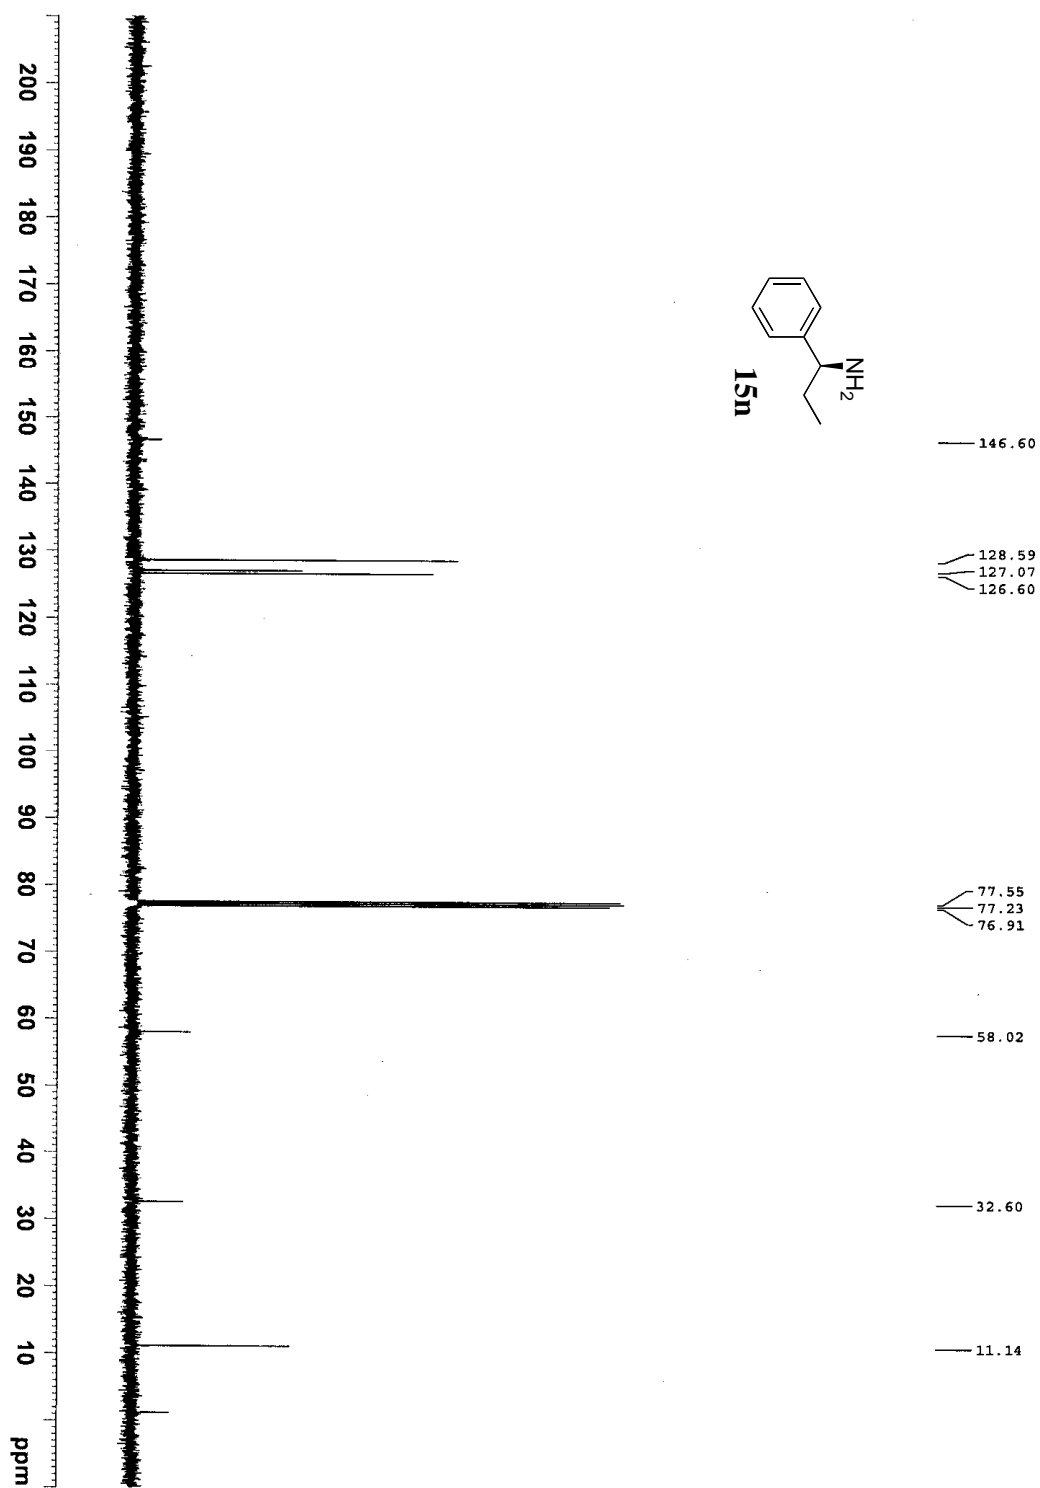

Supplement: c2ob26782a.pdf [file c2ob26782a.pdf]
